# Supplementary material for: Impact of route to diagnosis on treatment intent and 1-year survival in patients diagnosed with oesophagogastric cancer in England: a prospective cohort study
Source: PubMed Central journal article supplement — BMJ Open. 2013 Feb 12;3(2):e002129. doi: 10.1136/bmjopen-2012-002129 (PMC3585975; doi:10.1136/bmjopen-2012-002129), 2013-02-12
Supplement: bmjopen-2012-002129.draft_revisions.pdf [file bmjopen-2012-002129.draft_revisions.pdf]

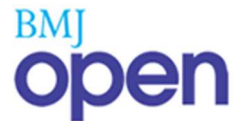

**Impact of route to diagnosis on treatment intent and 1-year survival  
in patients diagnosed with oesophago-gastric cancer in England**

|                                                                                                                                                         |                                                                                                                                                                                                                                                                                                                                                                                               |
|---------------------------------------------------------------------------------------------------------------------------------------------------------|-----------------------------------------------------------------------------------------------------------------------------------------------------------------------------------------------------------------------------------------------------------------------------------------------------------------------------------------------------------------------------------------------|
| Journal:                                                                                                                                                | <i>BMJ Open</i>                                                                                                                                                                                                                                                                                                                                                                               |
| Manuscript ID:                                                                                                                                          | bmjopen-2012-002129                                                                                                                                                                                                                                                                                                                                                                           |
| Article Type:                                                                                                                                           | Research                                                                                                                                                                                                                                                                                                                                                                                      |
| Date Submitted by the Author:                                                                                                                           | 18-Sep-2012                                                                                                                                                                                                                                                                                                                                                                                   |
| Complete List of Authors:                                                                                                                               | Palser, Thomas; The Royal College of Surgeons of England, Clinical Effectiveness Unit<br>Cromwell, David; London School of Hygiene and Tropical Medicine<br>Hardwick, Richard; Addenbrookes Hospital,<br>Riley, Stuart; Northern General Hospital,<br>Greenaway, Kimberley; Health and Social Care Information Centre,<br>van der Meulen, Jan; London School of Hygiene and Tropical Medicine |
| <b>Primary Subject Heading</b>:                                                                                                                         | Oncology                                                                                                                                                                                                                                                                                                                                                                                      |
| Secondary Subject Heading:                                                                                                                              | Health services research                                                                                                                                                                                                                                                                                                                                                                      |
| Keywords:                                                                                                                                               | Gastrointestinal tumours < ONCOLOGY, PRIMARY CARE, Quality in health care < HEALTH SERVICES ADMINISTRATION & MANAGEMENT                                                                                                                                                                                                                                                                       |
| Note: The following files were submitted by the author for peer review, but cannot be converted to PDF. You must view these files (e.g. movies) online. |                                                                                                                                                                                                                                                                                                                                                                                               |
| PalserCromwell_Figure1.wmf                                                                                                                              |                                                                                                                                                                                                                                                                                                                                                                                               |

SCHOLARONE™  
Manuscripts

1  
2  
3 ***Impact of route to diagnosis on treatment intent and 1-year survival***  
4  
5 ***in patients diagnosed with oesophago-gastric cancer in England***  
6  
7  
8  
9

10 **Short title:** Routes to diagnosis for oesophago-gastric cancer patients  
11

12  
13 Thomas R Palser MRCS, Clinical Research Fellow <sup>a</sup>  
14

15 David A Cromwell PhD, Senior Lecturer <sup>a b</sup>  
16

17 Richard H Hardwick MD FRCS, Consultant Oesophago-Gastric Surgeon <sup>c</sup>  
18

19 Stuart A Riley MD FRCP, Consultant Gastroenterologist <sup>d</sup>  
20

21 Kimberley Greenaway, Project Manager <sup>e</sup>  
22

23 Jan HP van der Meulen PhD, Professor of Clinical Epidemiology <sup>a b</sup>  
24

25 On behalf of the National Oesophago-Gastric Cancer Audit  
26

27 <sup>a</sup> Clinical Effectiveness Unit, The Royal College of Surgeons of England, London, WC2A 3PE, UK  
28

29 <sup>b</sup> London School of Tropical Medicine and Hygiene, London, WC1E 7HT, UK  
30

31 <sup>c</sup> Addenbrookes Hospital, Cambridge, CB2 0QQ, UK  
32

33 <sup>d</sup> Northern General Hospital, Sheffield, S5 7AU, UK  
34

35 <sup>e</sup> The Information Centre for Health and Social Care, Leeds, LS1 6AE, UK  
36

37 Correspondence to:  
38

39 Dr David Cromwell  
40

41 Department of Health Services Research and Policy  
42

43 London School of Hygiene and Tropical Medicine  
44

45 15-17 Tavistock Place  
46

47 London WC1H 9SH  
48

49 Tel 020 7869 6608 Fax: 020 7869 6644 Email: [david.cromwell@lshtm.ac.uk](mailto:david.cromwell@lshtm.ac.uk)  
50

51 Abstract: 253 words  
52

53 Main text: 2502 words  
54

55  
56  
57  
58  
59  
60  
Keywords: oesophago-gastric cancer, diagnosis, treatment outcomes

## Abstract

**OBJECTIVE:** To investigate the relationship between the route to diagnosis, patient characteristics, treatment intent and one-year survival among patients with oesophago-gastric (O-G) cancer.

**SETTING:** Cohort study in 142 English NHS trusts and 30 cancer networks.

**PARTICIPANTS:** Patients diagnosed with O-G cancer between October 2007 and June 2009.

**DESIGN:** Prospective cohort study. Route to diagnosis defined as general practitioner (GP) referral - urgent or non-urgent, hospital consultant referral, or after an emergency admission. Logistic regression was used to estimate associations and adjust for differences in casemix.

**MAIN OUTCOME MEASURES:** Proportion of patients diagnosed by route of diagnosis; proportion of patients selected for curative treatment; one-year survival.

**RESULTS:** Among 14,102 cancer patients, 66.3% were diagnosed after a GP referral, 16.4% after an emergency admission, and 17.4% after hospital consultant referral. Of the 9,351 GP referrals, 68.8% were urgent. Compared to urgent GP referrals, a markedly lower proportion of patients diagnosed after emergency admission had a curative treatment plan (36% v 16%; adjusted odds ratio (OR) = 0.62, 95% CI: 0.52 to 0.74) and a lower proportion of survived one year (43% v 27%; OR = 0.78; 0.68 to 0.89). Urgency of GP referral didn't affect treatment intent or survival. Routes to diagnosis varied across cancer networks, with the adjusted proportion of patients diagnosed after emergency admission ranging from 8.7% to 32.3%.

**CONCLUSION:** Outcomes for cancer patients are worse if diagnosed after emergency admission. Primary care and hospital services should work together to reduce rates of diagnosis after emergency admission and the variation across cancer networks.

## ARTICLE SUMMARY

### Article focus

- To investigate the relationship between the route to diagnosis, patient characteristics, treatment intent, and one-year survival.
- To examine whether the routes to diagnosis varied between regional cancer networks.

### Key messages

- Two thirds of patients diagnosed with O-G cancer were referred by their general practitioner (GP), of which around two-thirds were referred urgently. Patients referred urgently by their GP did not have better survival rates than non-urgent GP referrals
- One in six patients were diagnosed after an emergency admission, and these patients were less likely to have a curative treatment plan compared to urgent GP referrals. One-year survival was also worse.
- There was significant variation between cancer networks in the rates of emergency admission, which persisted after adjusting for patient factors.

### Strengths and limitations of the study

- The study uses data from the large, prospective sample of patients diagnosed in almost all English NHS trusts. 1-year survival was known for all patients.
- Limitations stem from the exclusion of patients due to missing data on route to diagnosis and treatment intent.

## INTRODUCTION

Oesophago-gastric (O-G) cancer is the fourth most common cause of cancer death in the United Kingdom resulting in approximately 12,500 deaths per year [1]. The majority of patients are diagnosed with advanced disease and only 20–30% are suitable for curative treatment [2,3]. Consequently, the prognosis is often poor, with 5-year relative survival being approximately 15% [4].

An objective of the UK Cancer Reform Strategy has been to increase the proportion of patients diagnosed with early cancer [5]. Meeting this objective represents a considerable challenge for oesophago-gastric (O-G) cancer services and general practitioners (GP). Many of the symptoms and signs of O-G cancer are non-specific and are present in large numbers of individuals without cancer [6]. For example, uncomplicated dyspepsia constitutes 3-4% of a general practitioner's workload [7,8] but an average general practice will only see four or five O-G cancer patients per year [6]. Guidelines recommend that GPs refer urgently to a specialist team only if patients present with “alarm symptoms” (eg, weight loss, vomiting dysphagia) or have persistent dyspepsia and are over 55 years [9-11]. However, these alarm symptoms are typically associated with advanced disease [12,13].

Across all cancer types, the number of patients diagnosed after an urgent GP referral increased from 80,000 in 2007 to 98,000 in 2009 [14]. But, for O-G cancer patients, information about patients' route to diagnosis and how this affects outcomes is limited [15]. Figures from routine data suggest that a substantial minority of O-G cancer patients are diagnosed following an

1  
2  
3 emergency presentation and these patients have worse survival [16,17]. One-year relative  
4  
5 survival among all patients with oesophageal cancer was 39% but it was only 21% for those  
6  
7 diagnosed after an emergency presentation. Among patients with stomach cancer, the  
8  
9 corresponding survival figures were 38% and 22%. However, evidence about these relationships  
10  
11 is sparse, and there is a need to understand how route to diagnosis contributes with patient  
12  
13 characteristics and treatment decisions to influence survival.  
14  
15  
16  
17  
18  
19

20 This study used a prospectively collected national clinical dataset of patients with O-G cancer in  
21  
22 England to investigate the relationship between the route to diagnosis, patient characteristics,  
23  
24 treatment intent, and one-year survival. We also examined whether the routes to diagnosis varied  
25  
26 between regional cancer networks.  
27  
28  
29  
30  
31

## 32 **MATERIALS AND METHODS**

33  
34 Data were collected prospectively by English NHS trusts as part of the national oesophago-  
35  
36 gastric cancer audit. All adult patients diagnosed in England with invasive, epithelial cancer of  
37  
38 the oesophagus or stomach between 1 October 2007 and 30 June 2009 were eligible for inclusion.  
39  
40 The audit method and dataset have been published elsewhere [3,18].  
41  
42  
43  
44  
45

46 The study distinguished between three routes to diagnosis: referral from a GP, referral after an  
47  
48 emergency admission, and an “other hospital referral” (patients referred by a hospital consultant  
49  
50 from a non-emergency setting). GP referrals were subdivided into urgent (for suspected cancer)  
51  
52 and non-urgent referrals. Information was also collected on the patient’s age at diagnosis, sex,  
53  
54 social deprivation, tumour site and TNM stage (version 6) [19], number of co-morbidities, ECOG  
55  
56  
57  
58  
59  
60

1  
2  
3 functional performance and treatment intent. Date of death was obtained from the Office for  
4 National Statistics death certificate register, which gave full follow-up for a minimum of 380  
5  
6 days from date of diagnosis. Tumour site was categorised as oesophageal (including Siewert 1-3  
7  
8 junctional tumours) or stomach. Treatment intent (curative or palliative) reflected the decision of  
9  
10 the multi-disciplinary team meeting after pre-treatment staging was completed. Social  
11  
12 deprivation was measured using the UK Index of Multiple Deprivation [20] with patients being  
13  
14 grouped into quintiles from least deprived (=1) to most deprived (=5).  
15  
16  
17  
18  
19  
20  
21

### 22 **Statistical analysis**

23  
24 We calculated the proportion of patients diagnosed via the different routes for all England and the  
25  
26 30 cancer networks that existed on 1 October 2007. Patients were grouped into networks by their  
27  
28 NHS trust of diagnosis. The relationship between two variables was examined using the chi-  
29  
30 squared test. The association between route to diagnosis and the proportion of patients having a  
31  
32 curative treatment plan and one-year survival was examined using logistic regression to control  
33  
34 for the influence of age at diagnosis, sex, regional deprivation, tumour site, pre-treatment stage,  
35  
36 comorbidities and performance status.  
37  
38  
39  
40  
41  
42

43 Multinomial logistic regression was used to adjust the proportion of patients diagnosed via each  
44  
45 route in each cancer network for patient characteristics [21]. Funnel plots were used to test  
46  
47 whether network rates differed significantly from the overall English rate [22]. These graphs  
48  
49 show the network rates together with the English rate and two sets of control limits that indicate  
50  
51 the ranges within which 95% or 99.8% of the network rates would be expected to fall if  
52  
53 differences from the English rate arose from random variation alone.  
54  
55  
56  
57  
58  
59  
60

1  
2  
3 The analysis was performed in STATA v10. All p-values are two-sided and those lower than  
4  
5 0.05 were considered to show a statistically significant result. Two variables used in the  
6  
7 regression models, performance status and pre-treatment stage, were known for 72% and 61% of  
8  
9 patients, respectively. Missing data values for these two variables were imputed using multiple  
10  
11 imputation by chained equations [23]. The imputation model included age at diagnosis, sex,  
12  
13 tumour site, deprivation, number of co-morbidities, referral source, and one-year survival.  
14  
15 Twenty-five imputations were created. Missing values were assumed to be “missing at random”  
16  
17  
18 (see additional file for details of missing and imputed values).  
19  
20  
21  
22  
23

## 24 RESULTS

25  
26 Information was collected on 16,264 patients from 152 English NHS trusts. Ten trusts were  
27  
28 excluded (1196 patients) because the route to diagnosis was entered for less than half of their  
29  
30 patients. Patient records that lacked route to diagnosis (n=956) or age at diagnosis (n=10) were  
31  
32 also excluded. This left 14,102 patients in the analysis. Their median age was 73 years, two-  
33  
34 thirds were male, and 69% had an oesophageal tumour. Patients with stomach tumours were  
35  
36 slightly older on average (mean 73.6 v 70.4 years,  $p<0.001$ ) and fewer were aged under 55 years  
37  
38 (7.1% v 9.3%,  $p<0.001$ ). Among patients with known pre-treatment stage, 44% had stage 4  
39  
40 (metastatic) disease.  
41  
42  
43  
44  
45  
46  
47

### 48 **Patterns of route to diagnosis**

49 Overall, 66.3% of patients were referred by their general practitioner, 16.4% were referred  
50  
51 following an emergency hospital admission and 17.3% were referred from another hospital  
52  
53 consultant. The proportion of GP referrals was lower among patients with stomach tumours  
54  
55 compared to oesophageal tumours, which reflected a greater proportion of stomach cancers being  
56  
57  
58  
59  
60



1  
2  
3 diagnosed after an emergency admission (see Table 1). Diagnosis after emergency admission  
4  
5 was least common among patients aged 55-64 years but increased among older and younger  
6  
7 patients. This route to diagnosis was also more common among patients as their performance  
8  
9 status got worse.  
10  
11

12  
13  
14 Among the 9,351 GP referrals, 6,438 patients (68.8%) were labelled as urgent (suspected cancer).  
15  
16 For oesophageal tumours, 64.4% of patients aged less than 55 years (the guideline threshold)  
17  
18 were referred urgently compared to 71.8% for older patients. For stomach tumours, the  
19  
20 proportions were 50.6% v 63.5%, respectively.  
21  
22  
23

### 24 25 26 **Association between route to diagnosis, treatment intent and one-year survival**

27  
28 There was a strong association between the route to diagnosis and the likelihood of a patient  
29  
30 having a curative treatment plan (Table 2). The differences in the unadjusted proportions partly  
31  
32 reflected the characteristics of the patients. For example, the proportions of patients with  
33  
34 metastatic disease (stage 4) were greatest amongst emergency admissions and least among other  
35  
36 consultant referrals (Table 1). There was also a greater proportion of patients with metastatic  
37  
38 disease among urgent GP referrals compared to non-urgent referrals (44.9% v 39.4%,  
39  
40 respectively). The difference in the unadjusted rates of curative treatment intent among urgent  
41  
42 and non-urgent GP referrals was removed after risk-adjustment. However, diagnosis after  
43  
44 emergency admission remained an independent predictor of treatment intent. Differences in one-  
45  
46 year survival, consistent with the differences observed in treatment intent, were also found for the  
47  
48 various routes to diagnosis (Table 2).  
49  
50  
51  
52  
53  
54  
55  
56  
57  
58  
59  
60

1  
2  
3 The routes to diagnosis varied distinctly between cancer networks. Adjusted rates of diagnosis  
4 after emergency admission ranged from 8.7% to 32.3%, and six networks fell outside the 99.8%  
5  
6 funnel limits (Figure 1). There was also substantial variation between the networks in the  
7  
8 adjusted rates of urgent referral among patients diagnosed after any GP referral. Five networks  
9  
10 had adjusted rates above 80%, while four had rates below 60%.  
11  
12  
13  
14  
15  
16

## 17 **DISCUSSION**

18  
19 This national study of 14,102 patients with O-G cancer adds to the limited evidence on patterns  
20 of referral and how route to diagnosis is related to treatment outcomes. We found that only 45%  
21 of patients were diagnosed after an urgent GP referral. Around 21% of patients were referred  
22 non-urgently by their GP which suggests the pattern of symptoms were not suggestive of cancer.  
23  
24 The remaining third were split evenly between diagnosis after an emergency admission and after  
25 referral by another hospital consultant. There was, however, substantial variation between cancer  
26  
27 networks in the proportion of patients diagnosed via each route.  
28  
29  
30  
31  
32  
33  
34  
35  
36  
37  
38

39 The importance of route to diagnosis is highlighted by its relationship to treatment intent and  
40 one-year survival. We found the proportion of patients planned to have curative treatment was  
41 considerably lower among patients diagnosed after an emergency admission (16%) compared to  
42 urgent GP referrals (36%). This was partly due to differences in the characteristics of patients  
43 diagnosed via these routes, with more patients diagnosed after an emergency admission having  
44 advanced disease. This suggests that diagnosis after emergency admission is a marker for late  
45 diagnosis. In addition, this route to diagnostic occurred more frequently among patients with  
46 stomach rather than oesophageal (including junctional) cancer, and was also associated with  
47 increasing age, more co-morbidity and worse performance status.  
48  
49  
50  
51  
52  
53  
54  
55  
56  
57  
58  
59  
60

1  
2  
3  
4  
5  
6 The proportion of urgent GP referrals was significantly lower among patients aged under 55  
7  
8 years and this may reflect the age criterion for urgent referral in the guideline on dyspepsia [9].  
9

10 We also observed that the proportion of patients with curative treatment plans was lower among  
11  
12 urgent GP referrals compared to non-urgent referrals. This is probably due to the alarm  
13  
14 symptoms which form the basis of the referral guidelines being associated with more advanced  
15  
16 disease [12,13].  
17  
18  
19

### 20 21 22 **Strengths and limitations** 23

24 The study was based on a large, prospective sample of patients diagnosed in 142 English NHS  
25  
26 trusts, 92% of all trusts providing O-G cancer care. Route to diagnosis was a pre-defined data  
27  
28 item and 1-year survival was known for all patients. The overall audit included 71% of all  
29  
30 patients diagnosed in England during the audit period. A limitation of the study was the  
31  
32 exclusion of patients and NHS trusts due to missing data meant this study had an estimated case-  
33  
34 ascertainment of 62%. Excluded patients tended to be younger (69.7 v 71.4 years,  $p < 0.001$ )  
35  
36 although differences in patient sex or location of tumour were not statistically significant.  
37  
38  
39  
40  
41  
42  
43  
44  
45  
46  
47  
48  
49  
50  
51  
52  
53  
54  
55  
56  
57  
58  
59  
60  
61  
62  
63  
64  
65  
66  
67  
68  
69  
70  
71  
72  
73  
74  
75  
76  
77  
78  
79  
80  
81  
82  
83  
84  
85  
86  
87  
88  
89  
90  
91  
92  
93  
94  
95  
96  
97  
98  
99  
100  
101  
102  
103  
104  
105  
106  
107  
108  
109  
110  
111  
112  
113  
114  
115  
116  
117  
118  
119  
120  
121  
122  
123  
124  
125  
126  
127  
128  
129  
130  
131  
132  
133  
134  
135  
136  
137  
138  
139  
140  
141  
142  
143  
144  
145  
146  
147  
148  
149  
150  
151  
152  
153  
154  
155  
156  
157  
158  
159  
160  
161  
162  
163  
164  
165  
166  
167  
168  
169  
170  
171  
172  
173  
174  
175  
176  
177  
178  
179  
180  
181  
182  
183  
184  
185  
186  
187  
188  
189  
190  
191  
192  
193  
194  
195  
196  
197  
198  
199  
200  
201  
202  
203  
204  
205  
206  
207  
208  
209  
210  
211  
212  
213  
214  
215  
216  
217  
218  
219  
220  
221  
222  
223  
224  
225  
226  
227  
228  
229  
230  
231  
232  
233  
234  
235  
236  
237  
238  
239  
240  
241  
242  
243  
244  
245  
246  
247  
248  
249  
250  
251  
252  
253  
254  
255  
256  
257  
258  
259  
260  
261  
262  
263  
264  
265  
266  
267  
268  
269  
270  
271  
272  
273  
274  
275  
276  
277  
278  
279  
280  
281  
282  
283  
284  
285  
286  
287  
288  
289  
290  
291  
292  
293  
294  
295  
296  
297  
298  
299  
300  
301  
302  
303  
304  
305  
306  
307  
308  
309  
310  
311  
312  
313  
314  
315  
316  
317  
318  
319  
320  
321  
322  
323  
324  
325  
326  
327  
328  
329  
330  
331  
332  
333  
334  
335  
336  
337  
338  
339  
340  
341  
342  
343  
344  
345  
346  
347  
348  
349  
350  
351  
352  
353  
354  
355  
356  
357  
358  
359  
360  
361  
362  
363  
364  
365  
366  
367  
368  
369  
370  
371  
372  
373  
374  
375  
376  
377  
378  
379  
380  
381  
382  
383  
384  
385  
386  
387  
388  
389  
390  
391  
392  
393  
394  
395  
396  
397  
398  
399  
400  
401  
402  
403  
404  
405  
406  
407  
408  
409  
410  
411  
412  
413  
414  
415  
416  
417  
418  
419  
420  
421  
422  
423  
424  
425  
426  
427  
428  
429  
430  
431  
432  
433  
434  
435  
436  
437  
438  
439  
440  
441  
442  
443  
444  
445  
446  
447  
448  
449  
450  
451  
452  
453  
454  
455  
456  
457  
458  
459  
460  
461  
462  
463  
464  
465  
466  
467  
468  
469  
470  
471  
472  
473  
474  
475  
476  
477  
478  
479  
480  
481  
482  
483  
484  
485  
486  
487  
488  
489  
490  
491  
492  
493  
494  
495  
496  
497  
498  
499  
500  
501  
502  
503  
504  
505  
506  
507  
508  
509  
510  
511  
512  
513  
514  
515  
516  
517  
518  
519  
520  
521  
522  
523  
524  
525  
526  
527  
528  
529  
530  
531  
532  
533  
534  
535  
536  
537  
538  
539  
540  
541  
542  
543  
544  
545  
546  
547  
548  
549  
550  
551  
552  
553  
554  
555  
556  
557  
558  
559  
560  
561  
562  
563  
564  
565  
566  
567  
568  
569  
570  
571  
572  
573  
574  
575  
576  
577  
578  
579  
580  
581  
582  
583  
584  
585  
586  
587  
588  
589  
590  
591  
592  
593  
594  
595  
596  
597  
598  
599  
600  
601  
602  
603  
604  
605  
606  
607  
608  
609  
610  
611  
612  
613  
614  
615  
616  
617  
618  
619  
620  
621  
622  
623  
624  
625  
626  
627  
628  
629  
630  
631  
632  
633  
634  
635  
636  
637  
638  
639  
640  
641  
642  
643  
644  
645  
646  
647  
648  
649  
650  
651  
652  
653  
654  
655  
656  
657  
658  
659  
660  
661  
662  
663  
664  
665  
666  
667  
668  
669  
670  
671  
672  
673  
674  
675  
676  
677  
678  
679  
680  
681  
682  
683  
684  
685  
686  
687  
688  
689  
690  
691  
692  
693  
694  
695  
696  
697  
698  
699  
700  
701  
702  
703  
704  
705  
706  
707  
708  
709  
710  
711  
712  
713  
714  
715  
716  
717  
718  
719  
720  
721  
722  
723  
724  
725  
726  
727  
728  
729  
730  
731  
732  
733  
734  
735  
736  
737  
738  
739  
740  
741  
742  
743  
744  
745  
746  
747  
748  
749  
750  
751  
752  
753  
754  
755  
756  
757  
758  
759  
760  
761  
762  
763  
764  
765  
766  
767  
768  
769  
770  
771  
772  
773  
774  
775  
776  
777  
778  
779  
780  
781  
782  
783  
784  
785  
786  
787  
788  
789  
790  
791  
792  
793  
794  
795  
796  
797  
798  
799  
800  
801  
802  
803  
804  
805  
806  
807  
808  
809  
810  
811  
812  
813  
814  
815  
816  
817  
818  
819  
820  
821  
822  
823  
824  
825  
826  
827  
828  
829  
830  
831  
832  
833  
834  
835  
836  
837  
838  
839  
840  
841  
842  
843  
844  
845  
846  
847  
848  
849  
850  
851  
852  
853  
854  
855  
856  
857  
858  
859  
860  
861  
862  
863  
864  
865  
866  
867  
868  
869  
870  
871  
872  
873  
874  
875  
876  
877  
878  
879  
880  
881  
882  
883  
884  
885  
886  
887  
888  
889  
890  
891  
892  
893  
894  
895  
896  
897  
898  
899  
900  
901  
902  
903  
904  
905  
906  
907  
908  
909  
910  
911  
912  
913  
914  
915  
916  
917  
918  
919  
920  
921  
922  
923  
924  
925  
926  
927  
928  
929  
930  
931  
932  
933  
934  
935  
936  
937  
938  
939  
940  
941  
942  
943  
944  
945  
946  
947  
948  
949  
950  
951  
952  
953  
954  
955  
956  
957  
958  
959  
960  
961  
962  
963  
964  
965  
966  
967  
968  
969  
970  
971  
972  
973  
974  
975  
976  
977  
978  
979  
980  
981  
982  
983  
984  
985  
986  
987  
988  
989  
990  
991  
992  
993  
994  
995  
996  
997  
998  
999  
1000

1  
2  
3 A second limitation is that treatment intent was missing for 5% of the 14,102 patients. This  
4  
5 might introduce bias in the estimated relationship between referral source and treatment intent but  
6  
7 this is likely to be small compared to the size of the observed association.  
8  
9

10  
11  
12 Another limitation concerns the information available for risk-adjustment. Many factors can  
13  
14 influence decisions about treatment intent and one-year survival, and there may be residual  
15  
16 confounding caused by unmeasured variables such as the symptoms experienced at diagnosis  
17  
18 [24]. However, the analysis included important prognostic factors such as age, comorbidity,  
19  
20 performance status and stage of disease, and residual confounding is unlikely to explain the  
21  
22 association between the outcomes and referral source. To incorporate performance status and  
23  
24 stage, the analysis used multiple imputation, which relies on the assumption that the data were  
25  
26 “missing at random”. This assumption seems plausible given the range of variables in the  
27  
28 imputation model (see additional document). Finally, the effect of the risk-adjustment on the  
29  
30 estimated network rates was comparatively small and it seems unlikely that the observed network  
31  
32 variation was due to inadequate risk-adjustment.  
33  
34  
35  
36  
37  
38  
39  
40

### 41 **Comparison with other studies**

42  
43 Few studies have examined the effect of the routes to diagnosis on outcomes for O-G cancer  
44  
45 patients. The results of our study are consistent with the evidence that patients diagnosed after  
46  
47 emergency have worse survival rates studies [16,25] but we are unaware of any previous study  
48  
49 that found, for patients diagnosed after referral by another consultant or non-urgent GP referral,  
50  
51 their prognosis was not adversely affected. Compared to the results derived from routine national  
52  
53 data [16], we found a higher proportion of diagnoses after urgent GP referral, and a lower  
54  
55 proportion after emergency admissions. These differences could stem from the distinct  
56  
57  
58  
59  
60

1  
2  
3 methodologies. In deriving the results from the routine data, the researchers created eight routes  
4  
5 to diagnosis by grouping 269 individual pathways for patients diagnosed in 2007 [26]. Our study  
6  
7 distinguished between four pre-defined categories prospectively captured by hospital staff.  
8  
9

10  
11  
12 The reasons for patients being diagnosed after emergency admission are currently unclear.  
13  
14 Various explanations have been proposed [25]. One suggestion is that these patients have more  
15  
16 aggressive forms of cancer than patients referred by GPs, or they were asymptomatic prior to  
17  
18 presenting at A&E. Other explanations are linked to factors delaying diagnosis. Such delays  
19  
20 might be patient related (because the patients ignored their symptoms, did not wish to seek care  
21  
22 or did not recognise the seriousness of their symptoms) or might be practitioner related (due to  
23  
24 acid suppression treatment, previous negative tests, or initial mis-diagnosis) [27].  
25  
26  
27  
28  
29  
30

### 31 **Implications for clinical practice and future research**

32  
33  
34 Recent government policy in England has focussed attention on the importance of an efficient  
35  
36 pathway to diagnosis by highlighting the worse survival rates for patients diagnosed after  
37  
38 emergency presentation [17]. This study provides additional insight into this relationship. That  
39  
40 patients diagnosed via this route are less likely to have a curative treatment plan compared to  
41  
42 urgent GP referrals arises in part because more patients have advanced disease. Higher rates of  
43  
44 diagnosis after emergency admission were also associated with older patients, greater frailty, and  
45  
46 more co-morbidity.  
47  
48  
49

50  
51  
52  
53 Further work is required to determine how the risk of emergency admission can be lowered for  
54  
55 patients with these characteristics. That the risk can be modified is implied by the variation  
56  
57 between cancer networks in the proportion of patients diagnosed after emergency admission. The  
58  
59  
60

1  
2  
3 variation suggests the organisation of services and practices within some networks makes this  
4  
5 less likely. The lessons to be learnt from these networks require investigation at a local level so  
6  
7 that appropriate strategies can be devised.  
8  
9

10  
11  
12 This study also provides new information on outcomes for patients diagnosed after urgent and  
13  
14 non-urgent GP referrals. The comparatively worse outcomes for patients referred urgently is  
15  
16 consistent with fact that the alarm symptoms used by current referral guidelines are associated  
17  
18 with more advanced disease [12,13]. There was considerable variation between cancer networks  
19  
20 in the proportion of patients referred urgently among all GP referrals. The reasons for this  
21  
22 variation remain unknown but it may reflect the clinical uncertainty and debate about the utility  
23  
24 of these alarm symptoms as criteria for referral. Further research is required on the symptom  
25  
26 profiles of patients referred by GPs as well as causes of delays in diagnosis among O-G cancer  
27  
28 patients.  
29  
30  
31  
32  
33  
34  
35  
36  
37  
38  
39  
40  
41  
42  
43  
44  
45  
46  
47  
48  
49  
50  
51  
52  
53  
54  
55  
56  
57  
58  
59  
60

## Acknowledgements

We would like to acknowledge the help of all of the health professionals and support personnel in English NHS trusts and Cancer Network for their efforts in submitting data to the Audit. We would also like to thank Steve Dean and Rose Napper of the Information Centre for Health and Social Care for their assistance in setting up and administering the Audit.

## Financial disclosure

The Audit was commissioned by the Healthcare Quality Improvement Partnership (HQIP).

## Author contributions

TP, DC, RH, SR conceived the study; TP, DC, RH, SR, JG, JvdM designed the study; TP and DC conducted the statistical analyses; TP and DC wrote the manuscript; RH, SR, JG, JvdM commented on and revised drafts; DC is guarantor.

## Ethical approval

Under UK National Research Ethics Service guidance, this study constituted service evaluation and did not require ethics approval.

## Competing Interests

All authors have completed the Unified Competing Interest form at [http://www.icmje.org/coi\\_disclosure.pdf](http://www.icmje.org/coi_disclosure.pdf) (available on request from the corresponding author) and declare: support from Healthcare Quality Improvement Partnership (HQIP) for the submitted work; no financial relationships with any organisations that might have an interest in the submitted work in the previous three years, no other relationships or activities that could appear to have influenced the submitted work."

## Data Sharing Statement

No additional information is available.

Table 1: Proportions of patients with oesophago-gastric cancer by the route to diagnosis.

|                               |                   | Patients | (%)  | Route to diagnosis (%) |                     |                | p-value |
|-------------------------------|-------------------|----------|------|------------------------|---------------------|----------------|---------|
|                               |                   |          |      | GP Referral            | Emergency admission | Other hospital |         |
| All patients                  |                   | 14,102   |      | 66                     | 16                  | 17             |         |
| Tumour                        | Oesophagus        | 9,755    | (69) | 71                     | 13                  | 16             | p<0.01  |
|                               | Stomach           | 4,347    | (31) | 56                     | 24                  | 19             |         |
| Gender                        | Female            | 4,631    | (33) | 66                     | 18                  | 17             | p=0.02  |
|                               | Male              | 9,471    | (67) | 67                     | 16                  | 18             |         |
| Age (years)                   | Under 55          | 1,215    | ( 9) | 66                     | 14                  | 20             | p<0.01  |
|                               | 55 to 64          | 2,567    | (18) | 72                     | 11                  | 17             |         |
|                               | 65 to 74          | 4,093    | (29) | 69                     | 13                  | 19             |         |
|                               | 75 to 84          | 4,465    | (32) | 65                     | 18                  | 17             |         |
|                               | 85 & over         | 1,762    | (12) | 58                     | 30                  | 12             |         |
| Index of Multiple Deprivation | 1 (Least)         | 2,498    | (18) | 70                     | 14                  | 16             | p<0.01  |
|                               | 2                 | 2,814    | (20) | 68                     | 16                  | 16             |         |
|                               | 3                 | 2,969    | (21) | 68                     | 15                  | 17             |         |
|                               | 4                 | 2,879    | (20) | 64                     | 19                  | 17             |         |
|                               | 5 (Most)          | 2,942    | (21) | 62                     | 18                  | 20             |         |
| Comorbidities                 | 0                 | 7,870    | (56) | 70                     | 14                  | 16             | p<0.01  |
|                               | 1                 | 3,829    | (27) | 65                     | 17                  | 18             |         |
|                               | 2                 | 1,676    | (12) | 59                     | 21                  | 19             |         |
|                               | 3 or more         | 727      | ( 5) | 54                     | 25                  | 21             |         |
| Performance Status            | 0                 | 3,541    | (25) | 74                     | 8                   | 19             | p<0.01  |
|                               | 1                 | 2,838    | (20) | 70                     | 12                  | 18             |         |
|                               | 2                 | 1,926    | (14) | 63                     | 20                  | 18             |         |
|                               | 3 or 4            | 1,812    | (13) | 48                     | 36                  | 16             |         |
|                               | Missing           | 3,985    | (28) | 67                     | 16                  | 16             |         |
| Pre-treatment Stage           | 1 or 2            | 2,543    | (18) | 64                     | 13                  | 22             | p<0.01  |
|                               | 3                 | 2,296    | (16) | 74                     | 11                  | 16             |         |
|                               | 4                 | 3,804    | (27) | 67                     | 20                  | 14             |         |
|                               | Unknown / missing | 5,459    | (39) | 64                     | 18                  | 18             |         |



Table 2: Relationship between route to diagnosis, curative treatment intent and 1-year survival among patients diagnosed with O-G cancer in English NHS trusts.

| Referral Source                        | Patients | Patients with outcome (%) | Unadjusted odds ratio* | Adjusted odds ratio‡ (95%CI) |
|----------------------------------------|----------|---------------------------|------------------------|------------------------------|
| <i>Patients with curative intent</i>   |          |                           |                        |                              |
| GP referral: urgent                    | 6,084    | 2,167 (36)                | 1                      | 1                            |
| GP referral: non-urgent                | 2,759    | 1,096 (40)                | 1.19                   | 1.02 0.90 to 1.15            |
| Emergency admission                    | 2,178    | 359 (16)                  | 0.36                   | 0.62 0.52 to 0.74            |
| Other hospital referral                | 2,326    | 1,059 (46)                | 1.51                   | 1.38 1.21 to 1.58            |
| All patients                           | 13,347   | 4,681 (35)                |                        |                              |
| <i>Patients who survive 1 year (%)</i> |          |                           |                        |                              |
| GP referral: urgent                    | 6,438    | 2,763 (43)                | 1                      | 1                            |
| GP referral: non-urgent                | 2,913    | 1,413 (49)                | 1.25                   | 1.11 1.00 to 1.24            |
| Emergency admission                    | 2,311    | 617 (27)                  | 0.48                   | 0.78 0.68 to 0.89            |
| Other hospital referral                | 2,440    | 1,288 (53)                | 1.49                   | 1.33 1.18 to 1.50            |
| All patients                           | 14,102   | 6,081 (43)                |                        |                              |

\*Odds ratio with GP referral: urgent as the baseline category.

‡ Adjusted odds ratio estimated using multiple logistic regression, adjusting for patients' age group, sex, tumour site, stage, number of comorbidities, performance status and regional deprivation.

1  
2  
3  
4  
5  
6  
7  
8  
9  
10  
11  
12  
13  
14  
15  
16  
17  
18  
19  
20  
21  
22  
23  
24  
25  
26  
27  
28  
29  
30  
31  
32  
33  
34  
35  
36  
37  
38  
39  
40  
41  
42  
43  
44  
45  
46  
47  
48  
49  
50  
51  
52  
53  
54  
55  
56  
57  
58  
59  
60

Figure 1: Proportion of patients referred after an emergency admission for the 30 English cancer networks, adjusted for patient age, sex, tumour site, comorbidities, performance status and regional deprivation

[Figure 1]

For peer review only

## References

1. Cancer Research UK Statistical Information Team 2011. Common cancers - UK mortality statistics. Accessed on 26/04/2011.  
<http://info.cancerresearchuk.org/cancerstats/mortality/cancerdeaths/>.
2. Scottish Audit of Gastro-oesophageal Cancer Steering Group. Gilbert FJ, Park KGM, Thompson AM. Scottish Audit of Gastro-oesophageal Cancer. Edinburgh: Information & Statistics Division, NHS Scotland, 2002
3. Cromwell DA, Palser TR, van der Meulen J, et al. The National Oesophago-Gastric Cancer Audit: Third Annual Report. Leeds: The NHS Information Centre, 2010
4. Office for National Statistics. Cancer survival in England - Patients diagnosed 2004–2008, followed up to 2009. Accessed on 26/04/2011.  
<http://www.statistics.gov.uk/pdfdir/can0411.pdf>
5. Richards MA. The national awareness and early diagnosis initiative in England: assembling the evidence. *Br J Cancer* 2009;101 Suppl 2:S1-S4.
6. Department of Health. Guidance on Commissioning Cancer Services: Improving Outcomes in Upper Gastro-Intestinal Cancers: The Manual. London: Department of Health, 2001
7. Bodger K, Eastwood PG, Manning SI, et al. Dyspepsia workload in urban general practice and implications of the British Society of Gastroenterology Dyspepsia guidelines. *Aliment Pharmacol Ther* 2000;14:413-20.
8. Heikkinen M, Pikkarainen P, Takala J, et al. General practitioners' approach to dyspepsia. Survey of consultation frequencies, treatment, and investigations. *Scand J Gastroenterol* 1996;31:648-53.
9. North of England Dyspepsia Guideline Development Group. Dyspepsia: managing dyspepsia in primary care. London: National Institute of Clinical Excellence, 2004.
10. National Collaborating Centre for Primary Care. Referral Guidelines for Suspected Cancer in Adults and Children. London: National Institute of Clinical Excellence, 2005.
11. Scottish Intercollegiate Guidelines Network. SIGN 87 - Management of oesophageal and gastric cancer. Edinburgh: SIGN, 2006.

12. Bowrey DJ, Griffin SM, Wayman J, et al. Use of alarm symptoms to select dyspeptics for endoscopy causes patients with curable esophagogastric cancer to be overlooked. *Surg Endosc* 2006;20:1725-8.
13. Meineche-Schmidt V, Jorgensen T. 'Alarm symptoms' in patients with dyspepsia: a three-year prospective study from general practice. *Scand J Gastroenterol* 2002;37:999-1007.
14. National Audit Office. *Delivering the Cancer Reform Strategy*. London: NAO, 2010.
15. Department of Health. *The Cancer Reform Strategy*. London: Department of Health, 2007
16. National Cancer Intelligence Network (NCIN). *Routes to Diagnosis – NCIN Data Briefing*. [http://www.ncin.org.uk/publications/data\\_briefings/routes\\_to\\_diagnosis.aspx](http://www.ncin.org.uk/publications/data_briefings/routes_to_diagnosis.aspx) Accessed on 28 January 2011.
17. Department of Health. *Improving outcomes: a strategy for cancer*. London: Department of Health, 2011.
18. Palser TR, Cromwell DA, van der Meulen J, et al. *The National Oesophago-Gastric Cancer Audit: Second Annual Report*. Leeds: The NHS Information Centre, 2009.
19. Sobin LH, Wittekind C (ed). *TNM Classification of Malignant Tumours*, International Union against Cancer (UICC), 6<sup>th</sup> edition. New York: Wiley-Liss, 2002.
20. Office of the Deputy Prime Minister (2004). *The English Indices of Deprivation 2004: Summary (revised)*. <http://webarchive.nationalarchives.gov.uk/20100410180038/http://www.communities.gov.uk/archived/publications/communities/indicesdeprivation>. Accessed: 1/11/2009
21. Hosmer DW, Lemeshow S. *Applied Logistic Regression*, 2nd Edition. Chichester: Wiley & Sons, 2000.
22. Spiegelhalter DJ. Funnel plots for comparing institutional performance. *Stat Med* 2005;24:1185-202
23. Royston P. Multiple imputation of missing values: Update of ICE. *Stata J* 2005;5:527-36.
24. Hippisley-Cox J, Coupland C. Identifying patients with suspected gastro-oesophageal cancer in primary care: derivation and validation of an algorithm. *Br J Gen Pract*. 2011;61:707-14.
25. Blackshaw GR, Stephens MR, Lewis WG, et al. Prognostic significance of acute presentation with emergency complications of gastric cancer. *Gastric Cancer* 2004;7:91-6.

1  
2  
3 26. National Cancer Intelligence Network. Routes to Diagnosis – Technical Supplement.  
4  
5 Accessed on 28 January 2011.

6  
7 [http://www.ncin.org.uk/publications/data\\_briefings/routes\\_to\\_diagnosis.aspx](http://www.ncin.org.uk/publications/data_briefings/routes_to_diagnosis.aspx)

8  
9 27. MacDonald S, Macleod U, Campbell NC, et al. Systematic review of factors influencing  
10 patient and practitioner delay in diagnosis of upper gastrointestinal cancer. Br J Cancer  
11 2006;94:1272–80.  
12  
13

14  
15  
16  
17  
18  
19  
20  
21  
22  
23  
24  
25  
26  
27  
28  
29  
30  
31  
32  
33  
34  
35  
36  
37  
38  
39  
40  
41  
42  
43  
44  
45  
46  
47  
48  
49  
50  
51  
52  
53  
54  
55  
56  
57  
58  
59  
60

For peer review only

## SUPPLEMENTARY INFORMATION

### Appendix 1: Information about patient characteristics and missing values and the effect of multiple-imputation on the estimates of logistic regression models

Table A1: Performance status at diagnosis across patient characteristics, before and after imputation

| Patient characteristic          |            | Performance status |     |     |     |    | Unknown |
|---------------------------------|------------|--------------------|-----|-----|-----|----|---------|
|                                 |            | 0                  | 1   | 2   | 3   | 4  |         |
| Tumour                          | Oesophagus | 27%                | 20% | 13% | 9%  | 2% | 29%     |
|                                 | Stomach    | 21%                | 20% | 15% | 14% | 3% | 27%     |
| Gender                          | Female     | 21%                | 20% | 15% | 12% | 3% | 29%     |
|                                 | Male       | 27%                | 20% | 13% | 10% | 2% | 28%     |
| Age (years)                     | Under 55   | 46%                | 17% | 7%  | 4%  | 1% | 26%     |
|                                 | 55 to 64   | 42%                | 20% | 8%  | 4%  | 1% | 26%     |
|                                 | 65 to 74   | 28%                | 24% | 13% | 8%  | 1% | 27%     |
|                                 | 75 to 84   | 15%                | 21% | 18% | 13% | 3% | 30%     |
|                                 | 85 & over  | 6%                 | 12% | 17% | 25% | 6% | 33%     |
| Index of Multiple Deprivation   | 1 (Least)  | 28%                | 18% | 11% | 9%  | 2% | 32%     |
|                                 | 2          | 27%                | 19% | 12% | 9%  | 3% | 30%     |
|                                 | 3          | 26%                | 20% | 13% | 10% | 2% | 29%     |
|                                 | 4          | 23%                | 22% | 15% | 11% | 2% | 26%     |
|                                 | 5 (Most)   | 22%                | 21% | 17% | 13% | 3% | 25%     |
| Comorbidities                   | 0          | 28%                | 16% | 9%  | 7%  | 1% | 38%     |
|                                 | 1          | 25%                | 26% | 17% | 12% | 3% | 17%     |
|                                 | 2          | 17%                | 24% | 22% | 18% | 4% | 15%     |
|                                 | 3 or more  | 9%                 | 23% | 25% | 24% | 4% | 15%     |
| Performance status distribution |            |                    |     |     |     |    |         |
| Before imputation (all)         |            | 25%                | 20% | 14% | 11% | 2% | 28%     |
| Before imputation (known)       |            | 35%                | 28% | 19% | 15% | 3% |         |
| Imputed values                  |            | 35%                | 28% | 19% | 14% | 3% |         |

Table A2: Pre-treatment (clinical) stage across patient characteristics, before and after imputation

| Patient characteristic           |            | Pre-treatment stage |     |     |     |         |
|----------------------------------|------------|---------------------|-----|-----|-----|---------|
|                                  |            | 1                   | 2   | 3   | 4   | Unknown |
| Tumour                           | Oesophagus | 3%                  | 14% | 19% | 26% | 37%     |
|                                  | Stomach    | 11%                 | 8%  | 11% | 29% | 42%     |
| Gender                           | Female     | 6%                  | 12% | 15% | 25% | 42%     |
|                                  | Male       | 5%                  | 13% | 17% | 28% | 37%     |
| Age (years)                      | Under 55   | 7%                  | 11% | 18% | 33% | 31%     |
|                                  | 55 to 64   | 5%                  | 14% | 20% | 29% | 32%     |
|                                  | 65 to 74   | 6%                  | 14% | 18% | 27% | 35%     |
|                                  | 75 to 84   | 6%                  | 12% | 14% | 27% | 41%     |
|                                  | 85 & over  | 5%                  | 8%  | 10% | 19% | 57%     |
| Index of Multiple Deprivation    | 1 (Least)  | 5%                  | 12% | 16% | 28% | 39%     |
|                                  | 2          | 6%                  | 13% | 16% | 26% | 38%     |
|                                  | 3          | 6%                  | 13% | 16% | 26% | 40%     |
|                                  | 4          | 6%                  | 13% | 15% | 27% | 39%     |
|                                  | 5 (Most)   | 6%                  | 11% | 17% | 28% | 38%     |
| Comorbidities                    | 0          | 5%                  | 11% | 15% | 27% | 42%     |
|                                  | 1          | 6%                  | 14% | 19% | 28% | 34%     |
|                                  | 2          | 7%                  | 17% | 17% | 25% | 34%     |
|                                  | 3 or more  | 11%                 | 15% | 16% | 24% | 34%     |
| Performance Status               | 0          | 8%                  | 17% | 24% | 22% | 29%     |
|                                  | 1          | 6%                  | 16% | 19% | 29% | 30%     |
|                                  | 2          | 5%                  | 12% | 16% | 33% | 34%     |
|                                  | 3          | 5%                  | 9%  | 10% | 35% | 41%     |
|                                  | 4          | 4%                  | 8%  | 5%  | 35% | 47%     |
|                                  | Unknown    | 4%                  | 8%  | 11% | 23% | 54%     |
| Pre-treatment Stage distribution |            |                     |     |     |     |         |
| Before imputation (all)          |            | 6%                  | 12% | 16% | 27% | 39%     |
| Before imputation (known)        |            | 9%                  | 20% | 27% | 44% |         |
| Imputed values                   |            | 9%                  | 20% | 26% | 45% |         |

Table A3: Results of logistic regression models for association between patient characteristics and odds of patients having a curative treatment plan

|                               |                         | Odds ratios of coefficients in regression model |             |                         |                        |
|-------------------------------|-------------------------|-------------------------------------------------|-------------|-------------------------|------------------------|
|                               |                         | Unadjusted                                      | Basic model | Model with imputed data | Complete case analysis |
| Route to                      | Urgent GP referral      | 1                                               | 1           | 1                       | 1                      |
| Diagnosis                     | Non-urgent GP referral  | 1.19                                            | 1.16        | 1.02                    | 1.00                   |
|                               | Emergency admission     | 0.36                                            | 0.43        | 0.62                    | 0.68                   |
|                               | Other hospital referral | 1.51                                            | 1.53        | 1.38                    | 1.30                   |
|                               |                         |                                                 |             |                         |                        |
| Tumour                        | Oesophagus              |                                                 | 1           | 1                       | 1                      |
|                               | Stomach                 |                                                 | 1.19        | 1.34                    | 1.63                   |
| Gender                        | Female                  |                                                 | 1           | 1                       | 1                      |
|                               | Male                    |                                                 | 1.16        | 1.19                    | 1.31                   |
| Age (years)                   | Under 55                |                                                 | 1.21        | 1.14                    | 1.37                   |
|                               | 55 to 64                |                                                 | 1.34        | 1.25                    | 1.48                   |
|                               | 65 to 74                |                                                 | 1           | 1                       | 1                      |
|                               | 75 to 84                |                                                 | 0.41        | 0.43                    | 0.34                   |
|                               | 85 & over               |                                                 | 0.07        | 0.08                    | 0.08                   |
| Index of Multiple Deprivation | 1 (Least)               |                                                 | 1           | 1                       | 1                      |
|                               | 2                       |                                                 | 1.10        | 1.09                    | 1.12                   |
|                               | 3                       |                                                 | 0.93        | 0.92                    | 0.90                   |
|                               | 4                       |                                                 | 0.96        | 0.98                    | 1.06                   |
|                               | 5 (Most)                |                                                 | 0.82        | 0.91                    | 0.93                   |
| No. of comorbidities          |                         |                                                 | 0.92        | 0.92                    | 0.82                   |
| Performance Status            | 0                       |                                                 |             | 1                       | 1                      |
|                               | 1                       |                                                 |             | 0.56                    | 0.49                   |
|                               | 2                       |                                                 |             | 0.28                    | 0.18                   |
|                               | 3 or 4                  |                                                 |             | 0.10                    | 0.03                   |
| Pre-treatment Stage           | 1                       |                                                 |             | 2.01                    | 3.22                   |
|                               | 2                       |                                                 |             | 1.62                    | 2.23                   |
|                               | 3                       |                                                 |             | 1                       | 1                      |
|                               | 4                       |                                                 |             | 0.15                    | 0.04                   |
| Area under the curve          |                         |                                                 | 0.72        | 0.86                    | 0.92                   |



Table A4: Results of logistic regression models for association between patient characteristics and odds of patients surviving one year

|                               |                         | Odds ratios of coefficients in regression model |             |                         |                        |
|-------------------------------|-------------------------|-------------------------------------------------|-------------|-------------------------|------------------------|
|                               |                         | Unadjusted                                      | Basic model | Model with imputed data | Complete case analysis |
| Route to                      | Urgent GP referral      | 1                                               | 1           | 1                       | 1                      |
| Diagnosis                     | Non-urgent GP referral  | 1.25                                            | 1.23        | 1.11                    | 1.12                   |
|                               | Emergency admission     | 0.48                                            | 0.55        | 0.78                    | 0.85                   |
|                               | Other hospital referral | 1.49                                            | 1.48        | 1.33                    | 1.48                   |
|                               |                         |                                                 |             |                         |                        |
| Tumour                        | Oesophagus              |                                                 | 1           | 1                       | 1                      |
|                               | Stomach                 |                                                 | 1.09        | 1.11                    | 1.11                   |
| Gender                        | Female                  |                                                 | 1           | 1                       | 1                      |
|                               | Male                    |                                                 | 1.03        | 1.01                    | 0.98                   |
| Age (years)                   | Under 55                |                                                 | 1.24        | 1.14                    | 1.12                   |
|                               | 55 to 64                |                                                 | 1.29        | 1.18                    | 1.16                   |
|                               | 65 to 74                |                                                 | 1           | 1                       | 1                      |
|                               | 75 to 84                |                                                 | 0.58        | 0.68                    | 0.66                   |
|                               | 85 & over               |                                                 | 0.34        | 0.47                    | 0.53                   |
| Index of Multiple Deprivation | 1 (Least)               |                                                 | 1           | 1                       | 1                      |
|                               | 2                       |                                                 | 1.10        | 1.10                    | 1.19                   |
|                               | 3                       |                                                 | 1.06        | 1.10                    | 1.11                   |
|                               | 4                       |                                                 | 0.98        | 1.02                    | 1.14                   |
|                               | 5 (Most)                |                                                 | 0.88        | 0.99                    | 1.02                   |
| No. of comorbidities          |                         |                                                 | 1.01        | 1.03                    | 1.02                   |
| Performance Status            | 0                       |                                                 |             | 1                       | 1                      |
|                               | 1                       |                                                 |             | 0.58                    | 0.59                   |
|                               | 2                       |                                                 |             | 0.34                    | 0.33                   |
|                               | 3 or 4                  |                                                 |             | 0.18                    | 0.14                   |
| Pre-treatment Stage           | 1                       |                                                 |             | 2.92                    | 3.37                   |
|                               | 2                       |                                                 |             | 1.70                    | 1.64                   |
|                               | 3                       |                                                 |             | 1                       | 1                      |
|                               | 4                       |                                                 |             | 0.31                    | 0.30                   |
| Area under the curve          |                         |                                                 | 0.65        | 0.79                    | 0.80                   |

STROBE 2007 (v4) Statement—Checklist of items that should be included in reports of cohort studies

| Section/Topic             | Item # | Recommendation                                                                                                                                                                       | Reported on page #                    |
|---------------------------|--------|--------------------------------------------------------------------------------------------------------------------------------------------------------------------------------------|---------------------------------------|
| Title and abstract        | 1      | (a) Indicate the study’s design with a commonly used term in the title or the abstract                                                                                               | Cohort design in abstract.            |
|                           |        | (b) Provide in the abstract an informative and balanced summary of what was done and what was found                                                                                  | 2                                     |
| <b>Introduction</b>       |        |                                                                                                                                                                                      |                                       |
| Background/rationale      | 2      | Explain the scientific background and rationale for the investigation being reported                                                                                                 | 4                                     |
| Objectives                | 3      | State specific objectives, including any prespecified hypotheses                                                                                                                     | 5                                     |
| <b>Methods</b>            |        |                                                                                                                                                                                      |                                       |
| Study design              | 4      | Present key elements of study design early in the paper                                                                                                                              | 5                                     |
| Setting                   | 5      | Describe the setting, locations, and relevant dates, including periods of recruitment, exposure, follow-up, and data collection                                                      | 5-6                                   |
| Participants              | 6      | (a) Give the eligibility criteria, and the sources and methods of selection of participants. Describe methods of follow-up                                                           | 5-6                                   |
|                           |        | (b) For matched studies, give matching criteria and number of exposed and unexposed                                                                                                  | n/a                                   |
| Variables                 | 7      | Clearly define all outcomes, exposures, predictors, potential confounders, and effect modifiers.                                                                                     | 5-6                                   |
| Data sources/ measurement | 8*     | For each variable of interest, give sources of data and details of methods of assessment (measurement). Describe comparability of assessment methods if there is more than one group | 5                                     |
| Bias                      | 9      | Describe any efforts to address potential sources of bias                                                                                                                            | 6                                     |
| Study size                | 10     | Explain how the study size was arrived at                                                                                                                                            | Aimed to collect all cases in England |
| Quantitative variables    | 11     | Explain how quantitative variables were handled in the analyses. If applicable, describe which groupings were chosen and why                                                         | 6                                     |
| Statistical methods       | 12     | (a) Describe all statistical methods, including those used to control for confounding                                                                                                | 6-7                                   |
|                           |        | (b) Describe any methods used to examine subgroups and interactions                                                                                                                  | 6                                     |
|                           |        | (c) Explain how missing data were addressed                                                                                                                                          | 7                                     |
|                           |        | (d) If applicable, explain how loss to follow-up was addressed                                                                                                                       | n/a                                   |
|                           |        | (e) Describe any sensitivity analyses                                                                                                                                                | n/a                                   |

| <b>Results</b>           |     |                                                                                                                                                                                                              |                      |
|--------------------------|-----|--------------------------------------------------------------------------------------------------------------------------------------------------------------------------------------------------------------|----------------------|
| Participants             | 13* | (a) Report numbers of individuals at each stage of study—eg numbers potentially eligible, examined for eligibility, confirmed eligible, included in the study, completing follow-up, and analysed            | 7                    |
|                          |     | (b) Give reasons for non-participation at each stage                                                                                                                                                         | n/a                  |
|                          |     | (c) Consider use of a flow diagram                                                                                                                                                                           | Not warranted        |
| Descriptive data         | 14* | (a) Give characteristics of study participants (eg demographic, clinical, social) and information on exposures and potential confounders                                                                     | Table 1 and appendix |
|                          |     | (b) Indicate number of participants with missing data for each variable of interest                                                                                                                          | Appendix             |
|                          |     | (c) Summarise follow-up time (eg, average and total amount)                                                                                                                                                  | Table 2              |
| Outcome data             | 15* | Report numbers of outcome events or summary measures over time                                                                                                                                               | n/a                  |
| Main results             | 16  | (a) Give unadjusted estimates and, if applicable, confounder-adjusted estimates and their precision (eg, 95% confidence interval). Make clear which confounders were adjusted for and why they were included | Tables 1 and 2       |
|                          |     | (b) Report category boundaries when continuous variables were categorized                                                                                                                                    | Table 1              |
|                          |     | (c) If relevant, consider translating estimates of relative risk into absolute risk for a meaningful time period                                                                                             | n/a                  |
| Other analyses           | 17  | Report other analyses done—eg analyses of subgroups and interactions, and sensitivity analyses                                                                                                               | Appendix             |
| <b>Discussion</b>        |     |                                                                                                                                                                                                              |                      |
| Key results              | 18  | Summarise key results with reference to study objectives                                                                                                                                                     | 9                    |
| <b>Limitations</b>       |     |                                                                                                                                                                                                              |                      |
| Interpretation           | 20  | Give a cautious overall interpretation of results considering objectives, limitations, multiplicity of analyses, results from similar studies, and other relevant evidence                                   | 10-11                |
| Generalisability         | 21  | Discuss the generalisability (external validity) of the study results                                                                                                                                        | 11-13                |
| <b>Other information</b> |     |                                                                                                                                                                                                              |                      |
| Funding                  | 22  | Give the source of funding and the role of the funders for the present study and, if applicable, for the original study on which the present article is based                                                | 14                   |

\*Give information separately for cases and controls in case-control studies and, if applicable, for exposed and unexposed groups in cohort and cross-sectional studies.

**Note:** An Explanation and Elaboration article discusses each checklist item and gives methodological background and published examples of transparent reporting. The STROBE checklist is best used in conjunction with this article (freely available on the Web sites of PLoS Medicine at <http://www.plosmedicine.org/>, Annals of Internal Medicine at <http://www.annals.org/>, and Epidemiology at <http://www.epidem.com/>). Information on the STROBE Initiative is available at [www.strobe-statement.org](http://www.strobe-statement.org).



**Impact of route to diagnosis on treatment intent and 1-year survival  
in patients diagnosed with oesophago-gastric cancer in England**

|                                 |                                                                                                                                                                                                                                                                                                                                                                                               |
|---------------------------------|-----------------------------------------------------------------------------------------------------------------------------------------------------------------------------------------------------------------------------------------------------------------------------------------------------------------------------------------------------------------------------------------------|
| Journal:                        | <i>BMJ Open</i>                                                                                                                                                                                                                                                                                                                                                                               |
| Manuscript ID:                  | bmjopen-2012-002129.R1                                                                                                                                                                                                                                                                                                                                                                        |
| Article Type:                   | Research                                                                                                                                                                                                                                                                                                                                                                                      |
| Date Submitted by the Author:   | 19-Dec-2012                                                                                                                                                                                                                                                                                                                                                                                   |
| Complete List of Authors:       | Palser, Thomas; The Royal College of Surgeons of England, Clinical Effectiveness Unit<br>Cromwell, David; London School of Hygiene and Tropical Medicine<br>Hardwick, Richard; Addenbrookes Hospital,<br>Riley, Stuart; Northern General Hospital,<br>Greenaway, Kimberley; Health and Social Care Information Centre,<br>van der Meulen, Jan; London School of Hygiene and Tropical Medicine |
| <b>Primary Subject Heading</b>: | Oncology                                                                                                                                                                                                                                                                                                                                                                                      |
| Secondary Subject Heading:      | Health services research, Gastroenterology and hepatology                                                                                                                                                                                                                                                                                                                                     |
| Keywords:                       | Gastrointestinal tumours < ONCOLOGY, PRIMARY CARE, Quality in health care < HEALTH SERVICES ADMINISTRATION & MANAGEMENT                                                                                                                                                                                                                                                                       |
|                                 |                                                                                                                                                                                                                                                                                                                                                                                               |

SCHOLARONE™  
Manuscripts

Only

1  
2  
3 ***Impact of route to diagnosis on treatment intent and 1-year survival***  
4  
5 ***in patients diagnosed with oesophago-gastric cancer in England***  
6  
7  
8  
9

10 **Short title:** Routes to diagnosis for oesophago-gastric cancer patients  
11

12  
13 Thomas R Palser MRCS, Clinical Research Fellow <sup>a</sup>

14 David A Cromwell PhD, Senior Lecturer <sup>a b</sup>

15 Richard H Hardwick MD FRCS, Consultant Oesophago-Gastric Surgeon <sup>c</sup>

16 Stuart A Riley MD FRCP, Consultant Gastroenterologist <sup>d</sup>

17 Kimberley Greenaway, Project Manager <sup>e</sup>

18 Jan HP van der Meulen PhD, Professor of Clinical Epidemiology <sup>a b</sup>

19 On behalf of the National Oesophago-Gastric Cancer Audit  
20  
21  
22  
23  
24  
25

26 <sup>a</sup> Clinical Effectiveness Unit, The Royal College of Surgeons of England, London, WC2A 3PE, UK

27 <sup>b</sup> London School of Tropical Medicine and Hygiene, London, WC1E 7HT, UK

28 <sup>c</sup> Addenbrookes Hospital, Cambridge, CB2 0QQ, UK

29 <sup>d</sup> Northern General Hospital, Sheffield, S5 7AU, UK

30 <sup>e</sup> The Information Centre for Health and Social Care, Leeds, LS1 6AE, UK  
31  
32  
33  
34

35 Correspondence to:

36 Dr David Cromwell

37 Department of Health Services Research and Policy

38 London School of Hygiene and Tropical Medicine

39 15-17 Tavistock Place

40 London WC1H 9SH

41 Tel 020 7869 6608 Fax: 020 7869 6644 Email: [david.cromwell@lshtm.ac.uk](mailto:david.cromwell@lshtm.ac.uk)  
42  
43  
44  
45  
46

47 Abstract: 253 words

48 Main text: 2502 words  
49  
50  
51  
52

53 Keywords: oesophago-gastric cancer, diagnosis, treatment outcomes  
54  
55  
56  
57  
58  
59  
60

## Abstract

**OBJECTIVE:** To investigate the relationship between the route to diagnosis, patient characteristics, treatment intent and one-year survival among patients with oesophago-gastric (O-G) cancer.

**SETTING:** Cohort study in 142 English NHS trusts and 30 cancer networks.

**PARTICIPANTS:** Patients diagnosed with O-G cancer between October 2007 and June 2009.

**DESIGN:** Prospective cohort study. Route to diagnosis defined as general practitioner (GP) referral - urgent (suspected cancer) or non-urgent, hospital consultant referral, or after an emergency admission. Logistic regression was used to estimate associations and adjust for differences in casemix.

**MAIN OUTCOME MEASURES:** Proportion of patients diagnosed by route of diagnosis; proportion of patients selected for curative treatment; one-year survival.

**RESULTS:** Among 14,102 cancer patients, 66.3% were diagnosed after a GP referral, 16.4% after an emergency admission, and 17.4% after hospital consultant referral. Of the 9,351 GP referrals, 68.8% were urgent. Compared to urgent GP referrals, a markedly lower proportion of patients diagnosed after emergency admission had a curative treatment plan (36% v 16%; adjusted odds ratio (OR) = 0.62, 95% CI: 0.52 to 0.74) and a lower proportion survived one year (43% v 27%; OR = 0.78; 0.68 to 0.89). Urgency of GP referral didn't affect treatment intent or survival. Routes to diagnosis varied across cancer networks, with the adjusted proportion of patients diagnosed after emergency admission ranging from 8.7% to 32.3%.

**CONCLUSION:** Outcomes for cancer patients are worse if diagnosed after emergency admission. Primary care and hospital services should work together to reduce rates of diagnosis after emergency admission and the variation across cancer networks.

## ARTICLE SUMMARY

### Article focus

- To investigate the relationship between the route to diagnosis, patient characteristics, treatment intent, and one-year survival.
- To examine whether the routes to diagnosis varied between regional cancer networks.

### Key messages

- Two thirds of patients diagnosed with O-G cancer were referred by their general practitioner (GP), of which around two-thirds were referred urgently. Patients referred as an urgent (two-week wait) referral by their GP did not have better survival rates than non-urgent GP referrals
- One in six patients were diagnosed after an emergency admission, and these patients were less likely to have a curative treatment plan compared to urgent GP referrals. One-year survival was also worse.
- There was significant variation between cancer networks in the rates of emergency admission, which persisted after adjusting for patient factors.

### Strengths and limitations of the study

- The study uses data from the large, prospective sample of patients diagnosed in almost all English NHS trusts. 1-year survival was known for all patients.
- Limitations stem from the study capturing only 62% of all patients eligible for the study and from the exclusion of patients due to missing data on route to diagnosis and treatment intent.

## INTRODUCTION

Oesophago-gastric (O-G) cancer is the fourth most common cause of cancer death in the United Kingdom resulting in approximately 12,500 deaths per year [1]. The majority of patients are diagnosed with advanced disease and only 20–30% are suitable for curative treatment [2,3]. Consequently, the prognosis is often poor, with 5-year relative survival being approximately 15% [4].

An objective of the UK Cancer Reform Strategy has been to increase the proportion of patients diagnosed with early cancer [5]. Meeting this objective represents a considerable challenge for oesophago-gastric (O-G) cancer services and general practitioners (GP). Many of the symptoms and signs of O-G cancer are non-specific and are present in large numbers of individuals without cancer [6]. For example, uncomplicated dyspepsia constitutes 3-4% of a general practitioner's workload [7,8] but an average general practice will only see four or five O-G cancer patients per year [6]. Guidelines recommend that GPs refer urgently to a specialist team only if patients present with “alarm symptoms” (eg, weight loss, vomiting dysphagia) or have persistent dyspepsia and are over 55 years [9-11]. However, these alarm symptoms are typically associated with advanced disease [12,13].

Across all cancer types, the number of patients diagnosed after an urgent GP referral increased from 80,000 in 2007 to 98,000 in 2009 [14]. But, for O-G cancer patients, information about patients' route to diagnosis and how this affects outcomes is limited [15]. Figures from routine data suggest that a substantial minority of O-G cancer patients are diagnosed following an



1  
2  
3 emergency presentation and these patients have worse survival [16-18]. One-year relative  
4 survival among all patients with oesophageal cancer was 40% but it was only 18% for those  
5  
6 diagnosed after an emergency presentation; among patients with stomach cancer, the  
7  
8 corresponding survival figures were 41% and 23% [18]. However, evidence about these  
9  
10 relationships is sparse, and there is a need to understand how route to diagnosis contributes with  
11  
12 patient characteristics and treatment decisions to influence survival.  
13  
14  
15  
16  
17  
18  
19

20 This study used a prospectively collected national clinical dataset of patients with O-G cancer in  
21  
22 England to investigate the relationship between the route to diagnosis, patient characteristics,  
23  
24 treatment intent, and one-year survival. We also examined whether the routes to diagnosis varied  
25  
26 between regional cancer networks.  
27  
28  
29  
30  
31

## 32 **MATERIALS AND METHODS**

33  
34 Data were collected prospectively by English NHS trusts as part of the national oesophago-  
35  
36 gastric cancer audit. All adult patients diagnosed in England with invasive, epithelial cancer of  
37  
38 the oesophagus or stomach between 1 October 2007 and 30 June 2009 were eligible for inclusion.  
39  
40 The audit method and dataset have been published elsewhere [3,19].  
41  
42  
43  
44  
45

46 The study captured route to diagnosis by adopting the “source of referral” and “cancer referral  
47  
48 priority” data items from the National Cancer Dataset [20]. Source of referral to the cancer  
49  
50 specialist / team differentiated between: referral from a GP (non-emergency, to outpatient  
51  
52 clinics), referral after an emergency admission (via Accident & Emergency, Medical Admissions  
53  
54 Unit, etc) and an “other hospital referral” (patients referred by a hospital consultant from a non-  
55  
56  
57  
58  
59  
60

1  
2  
3 emergency setting). Patients referred by GPs under the urgent “2-week wait” (2WW) referral  
4 system were classified as “urgent (for suspected cancer)”. All other GP referrals to the cancer  
5 team via outpatients were grouped as “non-urgent”. Information was also collected on the  
6 patient’s age at diagnosis, sex, social deprivation, tumour site and TNM stage (version 6) [21],  
7 number of co-morbidities, ECOG functional performance and treatment intent. Date of death  
8 was obtained from the Office for National Statistics death certificate register, which gave full  
9 follow-up for a minimum of 380 days from date of diagnosis. Tumour site was categorised as  
10 oesophageal (including Siewert 1-3 junctional tumours) or stomach. Treatment intent (curative  
11 or palliative) reflected the decision of the multi-disciplinary team meeting after pre-treatment  
12 staging was completed. Social deprivation was measured using the UK Index of Multiple  
13 Deprivation [22] with patients being grouped into quintiles from least deprived (=1) to most  
14 deprived (=5).

### 34 **Statistical analysis**

35  
36 We calculated the proportion of patients diagnosed via the different routes for all England and the  
37 30 cancer networks that existed on 1 October 2007. Patients were grouped into networks by their  
38 NHS trust of diagnosis. The relationship between two variables was examined using the chi-  
39 squared test. The association between route to diagnosis and the proportion of patients having a  
40 curative treatment plan and one-year survival was examined using logistic regression to control  
41 for the influence of age at diagnosis, sex, regional deprivation, tumour site, pre-treatment stage,  
42 comorbidities and performance status.

43  
44  
45  
46  
47  
48  
49  
50  
51  
52  
53  
54  
55 Multinomial logistic regression was used to adjust the proportion of patients diagnosed via each  
56 route in each cancer network for patient characteristics [23]. Funnel plots were used to test  
57  
58  
59  
60

1  
2  
3 whether network rates differed significantly from the overall English rate [24]. These graphs  
4  
5 show the network rates together with the English rate and two sets of control limits that indicate  
6  
7 the ranges within which 95% or 99.8% of the network rates would be expected to fall if  
8  
9 differences from the English rate arose from random variation alone.  
10  
11

12  
13  
14  
15 The analysis was performed in STATA v10. All p-values are two-sided and those lower than  
16  
17 0.05 were considered to show a statistically significant result. Two variables used in the  
18  
19 regression models, performance status and pre-treatment stage, were known for 72% and 61% of  
20  
21 patients, respectively. Missing data values for these two variables were imputed using multiple  
22  
23 imputation by chained equations [25]. The imputation model included age at diagnosis, sex,  
24  
25 tumour site, deprivation, number of co-morbidities, referral source, and one-year survival.  
26  
27  
28 Twenty-five imputations were created. Missing values were assumed to be “missing at random”  
29  
30 (see additional file for details of missing and imputed values).  
31  
32  
33  
34  
35

## 36 RESULTS

37  
38 Information was collected on 16,264 patients from 152 English NHS trusts. Ten NHS trusts were  
39  
40 excluded (1196 patients) because the route to diagnosis was entered for less than half of their  
41  
42 patients. Six of these trusts had this information on less than 10% of their patients. Other patient  
43  
44 records that lacked route to diagnosis (n=956) or age at diagnosis (n=10) were also excluded.  
45  
46  
47 This left 14,102 patients in the analysis. Their median age was 73 years, two-thirds were male,  
48  
49 and 69% had an oesophageal tumour. Patients with stomach tumours were slightly older on  
50  
51 average (mean 73.6 v 70.4 years,  $p<0.001$ ) and fewer were aged under 55 years (7.1% v 9.3%,  
52  
53  $p<0.001$ ). Among patients with known pre-treatment stage, 44% had stage 4 (metastatic) disease.  
54  
55  
56  
57  
58  
59  
60

### **Patterns of route to diagnosis**

Overall, 66.3% of patients were referred by their general practitioner, 16.4% were referred following an emergency hospital admission and 17.3% were referred from another hospital consultant. The proportion of GP referrals was lower among patients with stomach tumours compared to oesophageal tumours, which reflected a greater proportion of stomach cancers being diagnosed after an emergency admission (see Table 1). Diagnosis after emergency admission was least common among patients aged 55-64 years but increased among older and younger patients. This route to diagnosis was also more common among patients as their performance status got worse.

In terms of the overall routes to diagnosis, the proportions of patients with oesophageal and stomach tumours who were referred as urgent (2WW) were 50.3% and 35.3%, respectively. In relation to GP referrals only, 71.1% of oesophageal cancer patients and 62.6% of gastric cancer patients were labelled as urgent (2WW). These proportions were lower for patients whose age was below the guideline threshold. For oesophageal tumours, 64.4% of patients aged less than 55 years were referred urgently (2WW) by GPs compared to 71.8% for older patients. For stomach tumours, the proportions were 50.6% and 63.5%, respectively.

### **Association between route to diagnosis, treatment intent and one-year survival**

There was a strong association between the route to diagnosis and the likelihood of a patient having a curative treatment plan (Table 2). The differences in the unadjusted proportions partly reflected the characteristics of the patients. For example, the proportions of patients with metastatic disease (stage 4) were greatest amongst emergency admissions and least among other

1  
2  
3 consultant referrals (Table 1). There was also a greater proportion of patients with metastatic  
4 disease among urgent (2WW) GP referrals compared to non-urgent referrals (44.9% v 39.4%,  
5 respectively). The difference in the unadjusted rates of curative treatment intent among urgent  
6 (2WW) and non-urgent GP referrals was removed after risk-adjustment. However, diagnosis  
7 after emergency admission remained an independent predictor of treatment intent. Differences in  
8 one-year survival, consistent with the differences observed in treatment intent, were also found  
9 for the various routes to diagnosis (Table 2).

10  
11  
12  
13  
14  
15  
16  
17  
18  
19  
20  
21  
22 The routes to diagnosis varied distinctly between cancer networks. Adjusted rates of diagnosis  
23 after emergency admission ranged from 8.7% to 32.3%, and six networks fell outside the 99.8%  
24 funnel limits (Figure 1). There was also substantial variation between the networks in the  
25 adjusted rates of urgent (2WW) referral among patients diagnosed after any GP referral. Five  
26 networks had adjusted rates above 80%, while four had rates below 60%.

## 27 28 29 30 31 32 33 34 35 36 **DISCUSSION**

37  
38 This national study of 14,102 patients with O-G cancer adds to the limited evidence how routes  
39 to diagnosis are related to treatment outcomes. We found that only 45% of patients were  
40 diagnosed after an urgent (2WW) GP referral. Around 21% of patients were referred non-  
41 urgently by their GP which suggests their pattern of symptoms were not suggestive of cancer.  
42  
43 The remaining third were split evenly between diagnosis after an emergency admission and after  
44 referral by another hospital consultant. There was, however, substantial variation between cancer  
45 networks in the proportion of patients diagnosed via each route.

1  
2  
3 The importance of route to diagnosis is highlighted by its relationship to treatment intent and  
4 one-year survival. We found the proportion of patients planned to have curative treatment was  
5 considerably lower among patients diagnosed after an emergency admission (16%) compared to  
6 urgent (2WW) GP referrals (36%). This was partly due to differences in the characteristics of  
7 patients diagnosed via these routes, with more patients diagnosed after an emergency admission  
8 having advanced disease. This suggests that diagnosis after emergency admission is a marker for  
9 late diagnosis. In addition, this route to diagnostic occurred more frequently among patients with  
10 stomach rather than oesophageal (including junctional) cancer, and was also associated with  
11 increasing age, more co-morbidity and worse performance status.  
12  
13  
14  
15  
16  
17  
18  
19  
20  
21  
22  
23  
24  
25  
26

27 The proportion of urgent (2WW) GP referrals was significantly lower among patients aged under  
28 55 years and this may reflect the age criterion for urgent referral in the guideline on dyspepsia  
29 [9]. We also observed that the proportion of patients with curative treatment plans was lower  
30 among urgent (2WW) GP referrals compared to non-urgent referrals. This is probably due to the  
31 alarm symptoms which form the basis of the referral guidelines being associated with more  
32 advanced disease [12,13].  
33  
34  
35  
36  
37  
38  
39  
40  
41  
42

### 43 **Strengths and limitations**

44 The study was based on a large, prospective sample of patients diagnosed in 142 English NHS  
45 trusts, 92% of all trusts providing O-G cancer care. Route to diagnosis was defined using items  
46 from the English national cancer dataset and 1-year survival was known for all patients.  
47  
48  
49  
50  
51  
52  
53  
54

55 The study suffers from various limitations. First, using data from the routine Hospital Episode  
56 Statistics (HES) database, the overall audit was estimated to include 71% of patients diagnosed in  
57  
58  
59  
60

1  
2  
3 England during the data collection period [3]. Further excluding patient records and NHS trusts  
4 with missing data meant this analysis included 62% of all potential cases. The analysed Audit  
5 data and HES dataset showed similar demographic characteristics (average age was 71.4 and 71.3  
6 years, respectively, while the proportion of male patients was 67.2% and 66.3% respectively).  
7  
8 The differences between the analysed and excluded audit patients were also small. Excluded  
9 audit patients were slightly younger on average (69.7 v 71.4 years,  $p < 0.001$ ) but did not differ by  
10 a statistically significant amount in terms of patient sex (male 69.2% v 67.2%,  $p = 0.06$ ) or  
11 location of tumour (stomach 29.6% v 30.8%,  $p = 0.27$ ).  
12  
13  
14  
15  
16  
17  
18  
19  
20  
21  
22  
23

24 Another limitation was the variation in estimated case ascertainment between networks. Sixteen  
25 networks submitted data on over 70% of expected cases, while two submitted less than 40% of  
26 cases. Excluding records due to poor data quality produced marginal changes in case-  
27 ascertainment for most networks, with it being reduced by less than 5% for 19 networks.  
28  
29  
30  
31  
32  
33

34 Excluding the 10 NHS trusts because of poor route to diagnosis data affected six networks and  
35 reduced their case-ascertainment by between 11% and 42%. These exclusions could have biased  
36 the individual network rates if hospitals were selective in the patients submitted to the Audit  
37 and/or data completeness was related to particular patient characteristics. However, the routes to  
38 diagnosis within networks with high, medium and low case-ascertainment were not noticeably  
39 different, and selection bias is unlikely to explain the variation observed between networks.  
40  
41  
42  
43  
44  
45  
46  
47

48 Among the nine networks that submitted over 80% of estimated cases and that had less than 5%  
49 of records excluded for incomplete data, the adjusted proportion of patients diagnosed after a GP  
50 referral ranged from 52% to 71%, while the adjusted proportion of patients diagnosed after  
51 emergency admission ranged from 9% to 30%.  
52  
53  
54  
55  
56  
57  
58  
59  
60

1  
2  
3 A third limitation is that treatment intent was missing for 5% of the 14,102 patients. This might  
4  
5 introduce bias in the estimated relationship between referral source and treatment intent but this  
6  
7 is likely to be small compared to the size of the observed association.  
8  
9

10  
11  
12 Another limitation concerns the information available for risk-adjustment. Many factors can  
13  
14 influence decisions about treatment intent and one-year survival, and there may be residual  
15  
16 confounding caused by unmeasured variables such as the symptoms experienced at diagnosis  
17  
18 [26]. However, the analysis included important prognostic factors such as age, comorbidity,  
19  
20 performance status and stage of disease and residual confounding is unlikely to explain the  
21  
22 association between the outcomes and referral source. To incorporate performance status and  
23  
24 stage, the analysis used multiple imputation, which relies on the assumption that the data were  
25  
26 “missing at random”. This assumption seems plausible given the range of variables in the  
27  
28 imputation model (see additional document). Finally, the effect of the risk-adjustment on the  
29  
30 estimated network rates was comparatively small and it seems unlikely that the observed network  
31  
32 variation was due to inadequate risk-adjustment.  
33  
34  
35  
36  
37  
38  
39

### 40 41 **Comparison with other studies**

42  
43 Various studies have examined the pathway to diagnosis, with many focusing on patients  
44  
45 diagnosed after an urgent (2WW) GP referral. In a systematic review, Thorne et al [27] derived  
46  
47 pooled data on 498 patients from seven studies conducted between 2003 and 2008, and estimated  
48  
49 that 34% of patients with upper gastro-intestinal cancer were diagnosed after urgent (2WW) GP  
50  
51 referral. An audit of cancer diagnosis in English primary care in 2009/10 [28] reported that the  
52  
53 proportion of patients with oesophageal cancer (n=596) diagnosed after an urgent (2WW) GP  
54  
55 referral and emergency presentation was 58% and 10% respectively; for stomach cancers  
56  
57  
58  
59  
60



1  
2  
3 (n=319), the proportions were 40% and 21%, respectively. The national study using English  
4  
5 Cancer Registry and routine health data [18] reported higher rates of emergency presentation  
6  
7 (22% for oesophageal and 33% for stomach) and lower rates of urgent (2WW) GP referrals (34%  
8  
9 for oesophageal and 23% for stomach).  
10

11  
12  
13  
14  
15 Our results are generally comparable to these estimates. Compared to the results derived from  
16  
17 routine national data [18], we found a higher proportion of diagnoses after urgent (2WW) GP  
18  
19 referral, and a lower proportion after emergency admission. These differences could arise for  
20  
21 various reasons. First, the audit may have suffered from potential under-reporting of patients  
22  
23 diagnosed via particular pathways. Second, the two studies used different pathway categories  
24  
25 and the “emergency admission” definition from the National Cancer dataset and the NCIN  
26  
27 definition of emergency presentation may not entirely overlap. Finally, the studies had distinct  
28  
29 methodologies. In deriving the results from the routine data, the researchers created eight routes  
30  
31 to diagnosis by grouping 71 distinct combinations [18].  
32  
33  
34  
35  
36  
37  
38

39 Few studies have examined the effect of the routes to diagnosis on outcomes for O-G cancer  
40  
41 patients. The results of our study are consistent with the evidence that patients diagnosed after  
42  
43 emergency have worse survival rates [16,18,29] but we are unaware of any previous study that  
44  
45 found, for patients diagnosed after referral by another consultant or non-urgent GP referral, their  
46  
47 risk-adjusted prognosis was not adversely affected.  
48  
49  
50

51  
52  
53 The reasons for patients being diagnosed after emergency admission are currently unclear.  
54  
55 Various explanations have been proposed [29-32]. One suggestion is that these patients have  
56  
57 more aggressive forms of cancer than patients referred by GPs, or they were asymptomatic prior  
58  
59  
60

1  
2  
3 to presenting at A&E. Other explanations are linked to factors delaying diagnosis. Such delays  
4  
5 might be patient related (because the patients ignored their symptoms, did not wish to seek care  
6  
7 or did not recognise the seriousness of their symptoms) or might be practitioner related (due to  
8  
9 acid suppression treatment, previous negative tests, or initial mis-diagnosis) [32].  
10  
11

### 12 13 14 15 **Implications for clinical practice and future research**

16  
17 Recent government policy in England has focussed attention on the importance of an efficient  
18  
19 pathway to diagnosis by highlighting the worse survival rates for patients diagnosed after  
20  
21 emergency presentation [17]. This study provides additional insight into this relationship. That  
22  
23 patients diagnosed via this route are less likely to have a curative treatment plan compared to  
24  
25 urgent (2WW) GP referrals arises in part because more patients have advanced disease. Higher  
26  
27 rates of diagnosis after emergency admission were also associated with older patients, greater  
28  
29 frailty, and more co-morbidity.  
30  
31  
32

33  
34  
35  
36 Further work is required to determine how the risk of emergency admission can be lowered for  
37  
38 patients with these characteristics [30]. That the risk can be modified is implied by the variation  
39  
40 between cancer networks in the proportion of patients diagnosed after emergency admission. The  
41  
42 variation suggests the organisation of services and practices within some networks makes this  
43  
44 less likely. The lessons to be learnt from these networks require investigation at a local level so  
45  
46 that appropriate strategies can be devised.  
47  
48  
49

50  
51  
52  
53 This study also provides new information on outcomes for patients diagnosed after urgent  
54  
55 (2WW) and non-urgent GP referrals. The comparatively worse outcomes for patients referred  
56  
57 urgently is consistent with fact that the alarm symptoms used by current referral guidelines are  
58  
59  
60

1  
2  
3 associated with more advanced disease [12,13]. There was considerable variation between  
4  
5 cancer networks in the proportion of patients referred urgently among all GP referrals. The  
6  
7 reasons for this variation remain unknown but it may reflect the clinical uncertainty and debate  
8  
9 about the utility of these alarm symptoms as criteria for referral. Further research is required on  
10  
11 the symptom profiles of patients referred by GPs as well as causes of delays in diagnosis among  
12  
13 O-G cancer patients.  
14  
15  
16  
17  
18  
19  
20  
21  
22  
23  
24  
25  
26  
27  
28  
29  
30  
31  
32  
33  
34  
35  
36  
37  
38  
39  
40  
41  
42  
43  
44  
45  
46  
47  
48  
49  
50  
51  
52  
53  
54  
55  
56  
57  
58  
59  
60

## Acknowledgements

We would like to acknowledge the help of all of the health professionals and support personnel in English NHS trusts and Cancer Network for their efforts in submitting data to the Audit. We would also like to thank Steve Dean and Rose Napper of the Information Centre for Health and Social Care for their assistance in setting up and administering the Audit. No additional information is available.

## Financial disclosure

The Audit was commissioned by the Healthcare Quality Improvement Partnership (HQIP).

## Author contributions

TP, DC, RH, SR conceived the study; TP, DC, RH, SR, JG, JvdM designed the study; TP and DC conducted the statistical analyses; TP and DC wrote the manuscript; RH, SR, JG, JvdM commented on and revised drafts; DC is guarantor.

## Ethical approval

Under UK National Research Ethics Service guidance, this study constituted service evaluation and did not require ethics approval.

## Competing Interests

All authors have completed the Unified Competing Interest form at [http://www.icmje.org/coi\\_disclosure.pdf](http://www.icmje.org/coi_disclosure.pdf) (available on request from the corresponding author) and declare: support from Healthcare Quality Improvement Partnership (HQIP) for the submitted work; no financial relationships with any organisations that might have an interest in the submitted work in the previous three years, no other relationships or activities that could appear to have influenced the submitted work."

Table 1: Proportions of patients with oesophago-gastric cancer by the route to diagnosis.

|                               |                   | Patients | (%)  | Route to diagnosis (%) |                     |                | p-value |
|-------------------------------|-------------------|----------|------|------------------------|---------------------|----------------|---------|
|                               |                   |          |      | GP Referral            | Emergency admission | Other hospital |         |
| All patients                  |                   | 14,102   |      | 66                     | 16                  | 17             |         |
| Tumour                        | Oesophagus        | 9,755    | (69) | 71                     | 13                  | 16             | p<0.01  |
|                               | Stomach           | 4,347    | (31) | 56                     | 24                  | 19             |         |
| Gender                        | Female            | 4,631    | (33) | 66                     | 18                  | 17             | p=0.02  |
|                               | Male              | 9,471    | (67) | 67                     | 16                  | 18             |         |
| Age (years)                   | Under 55          | 1,215    | ( 9) | 66                     | 14                  | 20             | p<0.01  |
|                               | 55 to 64          | 2,567    | (18) | 72                     | 11                  | 17             |         |
|                               | 65 to 74          | 4,093    | (29) | 69                     | 13                  | 19             |         |
|                               | 75 to 84          | 4,465    | (32) | 65                     | 18                  | 17             |         |
|                               | 85 & over         | 1,762    | (12) | 58                     | 30                  | 12             |         |
| Index of Multiple Deprivation | 1 (Least)         | 2,498    | (18) | 70                     | 14                  | 16             | p<0.01  |
|                               | 2                 | 2,814    | (20) | 68                     | 16                  | 16             |         |
|                               | 3                 | 2,969    | (21) | 68                     | 15                  | 17             |         |
|                               | 4                 | 2,879    | (20) | 64                     | 19                  | 17             |         |
|                               | 5 (Most)          | 2,942    | (21) | 62                     | 18                  | 20             |         |
| Comorbidities                 | 0                 | 7,870    | (56) | 70                     | 14                  | 16             | p<0.01  |
|                               | 1                 | 3,829    | (27) | 65                     | 17                  | 18             |         |
|                               | 2                 | 1,676    | (12) | 59                     | 21                  | 19             |         |
|                               | 3 or more         | 727      | ( 5) | 54                     | 25                  | 21             |         |
| Performance Status            | 0                 | 3,541    | (25) | 74                     | 8                   | 19             | p<0.01  |
|                               | 1                 | 2,838    | (20) | 70                     | 12                  | 18             |         |
|                               | 2                 | 1,926    | (14) | 63                     | 20                  | 18             |         |
|                               | 3 or 4            | 1,812    | (13) | 48                     | 36                  | 16             |         |
|                               | Missing           | 3,985    | (28) | 67                     | 16                  | 16             |         |
| Pre-treatment Stage           | 1 or 2            | 2,543    | (18) | 64                     | 13                  | 22             | p<0.01  |
|                               | 3                 | 2,296    | (16) | 74                     | 11                  | 16             |         |
|                               | 4                 | 3,804    | (27) | 67                     | 20                  | 14             |         |
|                               | Unknown / missing | 5,459    | (39) | 64                     | 18                  | 18             |         |

Table 2: Relationship between route to diagnosis, curative treatment intent and 1-year survival among patients diagnosed with O-G cancer in English NHS trusts.

| Referral Source                        | Patients | Patients with outcome (%) | Unadjusted odds ratio* | Adjusted odds ratio‡ (95%CI) |
|----------------------------------------|----------|---------------------------|------------------------|------------------------------|
| <i>Patients with curative intent</i>   |          |                           |                        |                              |
| GP referral: urgent                    | 6,084    | 2,167 (36)                | 1                      | 1                            |
| GP referral: non-urgent                | 2,759    | 1,096 (40)                | 1.19                   | 1.02 0.90 to 1.15            |
| Emergency admission                    | 2,178    | 359 (16)                  | 0.36                   | 0.62 0.52 to 0.74            |
| Other hospital referral                | 2,326    | 1,059 (46)                | 1.51                   | 1.38 1.21 to 1.58            |
| All patients                           | 13,347   | 4,681 (35)                |                        |                              |
| <i>Patients who survive 1 year (%)</i> |          |                           |                        |                              |
| GP referral: urgent                    | 6,438    | 2,763 (43)                | 1                      | 1                            |
| GP referral: non-urgent                | 2,913    | 1,413 (49)                | 1.25                   | 1.11 1.00 to 1.24            |
| Emergency admission                    | 2,311    | 617 (27)                  | 0.48                   | 0.78 0.68 to 0.89            |
| Other hospital referral                | 2,440    | 1,288 (53)                | 1.49                   | 1.33 1.18 to 1.50            |
| All patients                           | 14,102   | 6,081 (43)                |                        |                              |

\*Odds ratio with GP referral: urgent as the baseline category.

‡ Adjusted odds ratio estimated using multiple logistic regression, adjusting for patients' age group, sex, tumour site, stage, number of comorbidities, performance status and regional deprivation.

1  
2  
3  
4  
5  
6  
7  
8  
9  
10  
11  
12  
13  
14  
15  
16  
17  
18  
19  
20  
21  
22  
23  
24  
25  
26  
27  
28  
29  
30  
31  
32  
33  
34  
35  
36  
37  
38  
39  
40  
41  
42  
43  
44  
45  
46  
47  
48  
49  
50  
51  
52  
53  
54  
55  
56  
57  
58  
59  
60

Figure 1: Proportion of patients referred after an emergency admission for the 30 English cancer networks, adjusted for patient age, sex, tumour site, comorbidities, performance status and regional deprivation

[Figure 1]

For peer review only

## References

1. Cancer Research UK Statistical Information Team 2011. Common cancers - UK mortality statistics. Accessed on 26/04/2011.  
<http://info.cancerresearchuk.org/cancerstats/mortality/cancerdeaths/>.
2. Scottish Audit of Gastro-oesophageal Cancer Steering Group. Gilbert FJ, Park KGM, Thompson AM. Scottish Audit of Gastro-oesophageal Cancer. Edinburgh: Information & Statistics Division, NHS Scotland, 2002
3. Cromwell DA, Palser TR, van der Meulen J, et al. The National Oesophago-Gastric Cancer Audit: Third Annual Report. Leeds: The NHS Information Centre, 2010
4. Office for National Statistics. Cancer survival in England - Patients diagnosed 2004–2008, followed up to 2009. Accessed on 26/04/2011.  
<http://www.statistics.gov.uk/pdfdir/can0411.pdf>
5. Richards MA. The national awareness and early diagnosis initiative in England: assembling the evidence. *Br J Cancer* 2009;101 Suppl 2:S1-S4.
6. Department of Health. Guidance on Commissioning Cancer Services: Improving Outcomes in Upper Gastro-Intestinal Cancers: The Manual. London: Department of Health, 2001
7. Bodger K, Eastwood PG, Manning SI, et al. Dyspepsia workload in urban general practice and implications of the British Society of Gastroenterology Dyspepsia guidelines. *Aliment Pharmacol Ther* 2000;14:413-20.
8. Heikkinen M, Pikkarainen P, Takala J, et al. General practitioners' approach to dyspepsia. Survey of consultation frequencies, treatment, and investigations. *Scand J Gastroenterol* 1996;31:648-53.
9. North of England Dyspepsia Guideline Development Group. Dyspepsia: managing dyspepsia in primary care. London: National Institute of Clinical Excellence, 2004.
10. National Collaborating Centre for Primary Care. Referral Guidelines for Suspected Cancer in Adults and Children. London: National Institute of Clinical Excellence, 2005.
11. Scottish Intercollegiate Guidelines Network. SIGN 87 - Management of oesophageal and gastric cancer. Edinburgh: SIGN, 2006.



12. Bowrey DJ, Griffin SM, Wayman J, et al. Use of alarm symptoms to select dyspeptics for endoscopy causes patients with curable esophagogastric cancer to be overlooked. *Surg Endosc* 2006;20:1725-8.
13. Meineche-Schmidt V, Jorgensen T. 'Alarm symptoms' in patients with dyspepsia: a three-year prospective study from general practice. *Scand J Gastroenterol* 2002;37:999-1007.
14. National Audit Office. *Delivering the Cancer Reform Strategy*. London: NAO, 2010.
15. Department of Health. *The Cancer Reform Strategy*. London: Department of Health, 2007
16. National Cancer Intelligence Network (NCIN). *Routes to Diagnosis – NCIN Data Briefing*. [http://www.ncin.org.uk/publications/data\\_briefings/routes\\_to\\_diagnosis.aspx](http://www.ncin.org.uk/publications/data_briefings/routes_to_diagnosis.aspx) Accessed on 28 January 2011.
17. Department of Health. *Improving outcomes: a strategy for cancer*. London: Department of Health, 2011.
18. Elliss-Brookes L, McPhail S, Ives A, et al. Routes to diagnosis for cancer - determining the patient journey using multiple routine data sets. *Br J Cancer*. 2012; 107(8): 1220-6.
19. Palser TR, Cromwell DA, van der Meulen J, et al. *The National Oesophago-Gastric Cancer Audit: Second Annual Report*. Leeds: The NHS Information Centre, 2009.
20. The NHS Information Centre. *Cancer Dataset Project. Cancer Data Manual. Version 4.5*, Leeds: The NHS Information Centre, 2006.
21. Sobin LH, Wittekind C (ed). *TNM Classification of Malignant Tumours, International Union against Cancer (UICC), 6<sup>th</sup> edition*. New York: Wiley-Liss, 2002.
22. Office of the Deputy Prime Minister (2004). *The English Indices of Deprivation 2004: Summary (revised)*. <http://webarchive.nationalarchives.gov.uk/20100410180038/http://www.communities.gov.uk/archived/publications/communities/indicesdeprivation>. Accessed: 1/11/2009
23. Hosmer DW, Lemeshow S. *Applied Logistic Regression, 2nd Edition*. Chichester: Wiley & Sons, 2000.
24. Spiegelhalter DJ. Funnel plots for comparing institutional performance. *Stat Med* 2005;24:1185-202
25. Royston P. Multiple imputation of missing values: Update of ICE. *Stata J* 2005;5:527-36.
26. Hippisley-Cox J, Coupland C. Identifying patients with suspected gastro-oesophageal cancer in primary care: derivation and validation of an algorithm. *Br J Gen Pract*. 2011;61:707-14.

- 1  
2  
3  
4  
5  
6  
7  
8  
9  
10  
11  
12  
13  
14  
15  
16  
17  
18  
19  
20  
21  
22  
23  
24  
25  
26  
27  
28  
29  
30  
31  
32  
33  
34  
35  
36  
37  
38  
39  
40  
41  
42  
43  
44  
45  
46  
47  
48  
49  
50  
51  
52  
53  
54  
55  
56  
57  
58  
59  
60
27. Thorne K, Hutchings H, Elwyn G. The two-week rule for NHS gastrointestinal cancer referrals: a systematic review of diagnostic effectiveness. *Open Colorectal Cancer J* 2009; 2: 27-33
28. Rubin G, McPhail S, Elliott K. *National Audit of Cancer Diagnosis in Primary Care*. London: Royal College of General Practitioners, 2011.
29. Blackshaw GR, Stephens MR, Lewis WG, et al. Prognostic significance of acute presentation with emergency complications of gastric cancer. *Gastric Cancer* 2004;7:91-6.
30. Hamilton W. Emergency admissions of cancer as a marker of diagnostic delay. *Br J Cancer*. 2012; 107(8): 1205-6
31. Bottle A, Tsang C, Parsons C, et al. Association between patient and general practice characteristics and unplanned first-time admissions for cancer: observational study. *Br J Cancer*. 2012; 107(8):1213-9
32. MacDonald S, Macleod U, Campbell NC, et al. Systematic review of factors influencing patient and practitioner delay in diagnosis of upper gastrointestinal cancer. *Br J Cancer* 2006;94:1272–80.

1  
2  
3 ***Impact of route to diagnosis on treatment intent and 1-year survival***  
4  
5 ***in patients diagnosed with oesophago-gastric cancer in England***  
6  
7  
8

9  
10 **Short title:** Routes to diagnosis for oesophago-gastric cancer patients  
11

12  
13 Thomas R Palser MRCS, Clinical Research Fellow <sup>a</sup>  
14

15 David A Cromwell PhD, Senior Lecturer <sup>a b</sup>  
16

17 Richard H Hardwick MD FRCS, Consultant Oesophago-Gastric Surgeon <sup>c</sup>  
18

19 Stuart A Riley MD FRCP, Consultant Gastroenterologist <sup>d</sup>  
20

21 Kimberley Greenaway, Project Manager <sup>e</sup>  
22

23 Jan HP van der Meulen PhD, Professor of Clinical Epidemiology <sup>a b</sup>  
24

25 On behalf of the National Oesophago-Gastric Cancer Audit  
26

27 <sup>a</sup> Clinical Effectiveness Unit, The Royal College of Surgeons of England, London, WC2A 3PE, UK  
28

29 <sup>b</sup> London School of Tropical Medicine and Hygiene, London, WC1E 7HT, UK  
30

31 <sup>c</sup> Addenbrookes Hospital, Cambridge, CB2 0QQ, UK  
32

33 <sup>d</sup> Northern General Hospital, Sheffield, S5 7AU, UK  
34

35 <sup>e</sup> The Information Centre for Health and Social Care, Leeds, LS1 6AE, UK  
36

37 Correspondence to:  
38

39 Dr David Cromwell  
40

41 Department of Health Services Research and Policy  
42

43 London School of Hygiene and Tropical Medicine  
44

45 15-17 Tavistock Place  
46

47 London WC1H 9SH  
48

49 Tel 020 7869 6608 Fax: 020 7869 6644 Email: [david.cromwell@lshtm.ac.uk](mailto:david.cromwell@lshtm.ac.uk)  
50

51 Abstract: 253 words  
52

53 Main text: 2502 words  
54

55  
56  
57  
58  
59  
60  
Keywords: oesophago-gastric cancer, diagnosis, treatment outcomes

## Abstract

**OBJECTIVE:** To investigate the relationship between the route to diagnosis, patient characteristics, treatment intent and one-year survival among patients with oesophago-gastric (O-G) cancer.

**SETTING:** Cohort study in 142 English NHS trusts and 30 cancer networks.

**PARTICIPANTS:** Patients diagnosed with O-G cancer between October 2007 and June 2009.

**DESIGN:** Prospective cohort study. Route to diagnosis defined as general practitioner (GP) referral - urgent (suspected cancer) or non-urgent, hospital consultant referral, or after an emergency admission. Logistic regression was used to estimate associations and adjust for differences in casemix.

**MAIN OUTCOME MEASURES:** Proportion of patients diagnosed by route of diagnosis; proportion of patients selected for curative treatment; one-year survival.

**RESULTS:** Among 14,102 cancer patients, 66.3% were diagnosed after a GP referral, 16.4% after an emergency admission, and 17.4% after hospital consultant referral. Of the 9,351 GP referrals, 68.8% were urgent. Compared to urgent GP referrals, a markedly lower proportion of patients diagnosed after emergency admission had a curative treatment plan (36% v 16%; adjusted odds ratio (OR) = 0.62, 95% CI: 0.52 to 0.74) and a lower proportion survived one year (43% v 27%; OR = 0.78; 0.68 to 0.89). Urgency of GP referral didn't affect treatment intent or survival. Routes to diagnosis varied across cancer networks, with the adjusted proportion of patients diagnosed after emergency admission ranging from 8.7% to 32.3%.

**CONCLUSION:** Outcomes for cancer patients are worse if diagnosed after emergency admission. Primary care and hospital services should work together to reduce rates of diagnosis after emergency admission and the variation across cancer networks.

## ARTICLE SUMMARY

### Article focus

- To investigate the relationship between the route to diagnosis, patient characteristics, treatment intent, and one-year survival.
- To examine whether the routes to diagnosis varied between regional cancer networks.

### Key messages

- Two thirds of patients diagnosed with O-G cancer were referred by their general practitioner (GP), of which around two-thirds were referred urgently. Patients referred as an urgent (two-week wait) referral by their GP did not have better survival rates than non-urgent GP referrals
- One in six patients were diagnosed after an emergency admission, and these patients were less likely to have a curative treatment plan compared to urgent GP referrals. One-year survival was also worse.
- There was significant variation between cancer networks in the rates of emergency admission, which persisted after adjusting for patient factors.

### Strengths and limitations of the study

- The study uses data from the large, prospective sample of patients diagnosed in almost all English NHS trusts. 1-year survival was known for all patients.
- Limitations stem from the study capturing only 62% of all patients eligible for the study and from the exclusion of patients due to missing data on route to diagnosis and treatment intent.

## INTRODUCTION

Oesophago-gastric (O-G) cancer is the fourth most common cause of cancer death in the United Kingdom resulting in approximately 12,500 deaths per year [1]. The majority of patients are diagnosed with advanced disease and only 20–30% are suitable for curative treatment [2,3]. Consequently, the prognosis is often poor, with 5-year relative survival being approximately 15% [4].

An objective of the UK Cancer Reform Strategy has been to increase the proportion of patients diagnosed with early cancer [5]. Meeting this objective represents a considerable challenge for oesophago-gastric (O-G) cancer services and general practitioners (GP). Many of the symptoms and signs of O-G cancer are non-specific and are present in large numbers of individuals without cancer [6]. For example, uncomplicated dyspepsia constitutes 3-4% of a general practitioner's workload [7,8] but an average general practice will only see four or five O-G cancer patients per year [6]. Guidelines recommend that GPs refer urgently to a specialist team only if patients present with “alarm symptoms” (eg, weight loss, vomiting dysphagia) or have persistent dyspepsia and are over 55 years [9-11]. However, these alarm symptoms are typically associated with advanced disease [12,13].

Across all cancer types, the number of patients diagnosed after an urgent GP referral increased from 80,000 in 2007 to 98,000 in 2009 [14]. But, for O-G cancer patients, information about patients' route to diagnosis and how this affects outcomes is limited [15]. Figures from routine data suggest that a substantial minority of O-G cancer patients are diagnosed following an

1  
2  
3 emergency presentation and these patients have worse survival [16-18]. One-year relative  
4 survival among all patients with oesophageal cancer was 40% but it was only 18% for those  
5 diagnosed after an emergency presentation; among patients with stomach cancer, the  
6 corresponding survival figures were 41% and 23% [18]. However, evidence about these  
7 relationships is sparse, and there is a need to understand how route to diagnosis contributes with  
8 patient characteristics and treatment decisions to influence survival.  
9  
10  
11  
12  
13  
14  
15  
16  
17  
18  
19

20 This study used a prospectively collected national clinical dataset of patients with O-G cancer in  
21 England to investigate the relationship between the route to diagnosis, patient characteristics,  
22 treatment intent, and one-year survival. We also examined whether the routes to diagnosis varied  
23 between regional cancer networks.  
24  
25  
26  
27  
28  
29  
30  
31

## 32 MATERIALS AND METHODS

33  
34 Data were collected prospectively by English NHS trusts as part of the national oesophago-  
35 gastric cancer audit. All adult patients diagnosed in England with invasive, epithelial cancer of  
36 the oesophagus or stomach between 1 October 2007 and 30 June 2009 were eligible for inclusion.  
37  
38  
39 The audit method and dataset have been published elsewhere [3,19].  
40  
41  
42  
43  
44  
45

46 The study captured route to diagnosis by adopting the “source of referral” and “cancer referral  
47 priority” data items from the National Cancer Dataset [20]. Source of referral to the cancer  
48 specialist / team differentiated between: referral from a GP (non-emergency, to outpatient  
49 clinics), referral after an emergency admission (via Accident & Emergency, Medical Admissions  
50 Unit, etc) and an “other hospital referral” (patients referred by a hospital consultant from a non-  
51  
52  
53  
54  
55  
56  
57  
58  
59  
60

1  
2  
3 emergency setting). Patients referred by GPs under the urgent “2-week wait” (2WW) referral  
4  
5 system were classified as “urgent (for suspected cancer)”. All other GP referrals to the cancer  
6  
7 team via outpatients were grouped as “non-urgent”. Information was also collected on the  
8  
9 patient’s age at diagnosis, sex, social deprivation, tumour site and TNM stage (version 6) [21],  
10  
11 number of co-morbidities, ECOG functional performance and treatment intent. Date of death  
12  
13 was obtained from the Office for National Statistics death certificate register, which gave full  
14  
15 follow-up for a minimum of 380 days from date of diagnosis. Tumour site was categorised as  
16  
17 oesophageal (including Siewert 1-3 junctional tumours) or stomach. Treatment intent (curative  
18  
19 or palliative) reflected the decision of the multi-disciplinary team meeting after pre-treatment  
20  
21 staging was completed. Social deprivation was measured using the UK Index of Multiple  
22  
23 Deprivation [22] with patients being grouped into quintiles from least deprived (=1) to most  
24  
25 deprived (=5).  
26  
27  
28  
29  
30  
31  
32  
33

### 34 **Statistical analysis**

35  
36 We calculated the proportion of patients diagnosed via the different routes for all England and the  
37  
38 30 cancer networks that existed on 1 October 2007. Patients were grouped into networks by their  
39  
40 NHS trust of diagnosis. The relationship between two variables was examined using the chi-  
41  
42 squared test. The association between route to diagnosis and the proportion of patients having a  
43  
44 curative treatment plan and one-year survival was examined using logistic regression to control  
45  
46 for the influence of age at diagnosis, sex, regional deprivation, tumour site, pre-treatment stage,  
47  
48 comorbidities and performance status.  
49  
50  
51  
52  
53  
54

55 Multinomial logistic regression was used to adjust the proportion of patients diagnosed via each  
56  
57 route in each cancer network for patient characteristics [23]. Funnel plots were used to test  
58  
59  
60



1  
2  
3 whether network rates differed significantly from the overall English rate [24]. These graphs  
4  
5 show the network rates together with the English rate and two sets of control limits that indicate  
6  
7 the ranges within which 95% or 99.8% of the network rates would be expected to fall if  
8  
9 differences from the English rate arose from random variation alone.  
10  
11

12  
13  
14  
15 The analysis was performed in STATA v10. All p-values are two-sided and those lower than  
16  
17 0.05 were considered to show a statistically significant result. Two variables used in the  
18  
19 regression models, performance status and pre-treatment stage, were known for 72% and 61% of  
20  
21 patients, respectively. Missing data values for these two variables were imputed using multiple  
22  
23 imputation by chained equations [25]. The imputation model included age at diagnosis, sex,  
24  
25 tumour site, deprivation, number of co-morbidities, referral source, and one-year survival.  
26  
27 Twenty-five imputations were created. Missing values were assumed to be “missing at random”  
28  
29 (see additional file for details of missing and imputed values).  
30  
31  
32  
33  
34  
35

## 36 RESULTS

37  
38 Information was collected on 16,264 patients from 152 English NHS trusts. Ten NHS trusts were  
39  
40 excluded (1196 patients) because the route to diagnosis was entered for less than half of their  
41  
42 patients. Six of these trusts had this information on less than 10% of their patients. Other patient  
43  
44 records that lacked route to diagnosis (n=956) or age at diagnosis (n=10) were also excluded.  
45  
46 This left 14,102 patients in the analysis. Their median age was 73 years, two-thirds were male,  
47  
48 and 69% had an oesophageal tumour. Patients with stomach tumours were slightly older on  
49  
50 average (mean 73.6 v 70.4 years, p<0.001) and fewer were aged under 55 years (7.1% v 9.3%,  
51  
52 p<0.001). Among patients with known pre-treatment stage, 44% had stage 4 (metastatic) disease.  
53  
54  
55  
56  
57  
58  
59  
60

### Patterns of route to diagnosis

Overall, 66.3% of patients were referred by their general practitioner, 16.4% were referred following an emergency hospital admission and 17.3% were referred from another hospital consultant. The proportion of GP referrals was lower among patients with stomach tumours compared to oesophageal tumours, which reflected a greater proportion of stomach cancers being diagnosed after an emergency admission (see Table 1). Diagnosis after emergency admission was least common among patients aged 55-64 years but increased among older and younger patients. This route to diagnosis was also more common among patients as their performance status got worse.

In terms of the overall routes to diagnosis, the proportions of patients with oesophageal and stomach tumours who were referred as urgent (2WW) were 50.3% and 35.3%, respectively. In relation to GP referrals only, 71.1% of oesophageal cancer patients and 62.6% of gastric cancer patients were labelled as urgent (2WW). These proportions were lower for patients whose age was below the guideline threshold. For oesophageal tumours, 64.4% of patients aged less than 55 years were referred urgently (2WW) by GPs compared to 71.8% for older patients. For stomach tumours, the proportions were 50.6% and 63.5%, respectively.

### Association between route to diagnosis, treatment intent and one-year survival

There was a strong association between the route to diagnosis and the likelihood of a patient having a curative treatment plan (Table 2). The differences in the unadjusted proportions partly reflected the characteristics of the patients. For example, the proportions of patients with metastatic disease (stage 4) were greatest amongst emergency admissions and least among other

1  
2  
3 consultant referrals (Table 1). There was also a greater proportion of patients with metastatic  
4 disease among urgent (2WW) GP referrals compared to non-urgent referrals (44.9% v 39.4%,  
5 respectively). The difference in the unadjusted rates of curative treatment intent among urgent  
6 (2WW) and non-urgent GP referrals was removed after risk-adjustment. However, diagnosis  
7 after emergency admission remained an independent predictor of treatment intent. Differences in  
8 one-year survival, consistent with the differences observed in treatment intent, were also found  
9 for the various routes to diagnosis (Table 2).

10  
11  
12  
13  
14  
15  
16  
17  
18  
19  
20  
21  
22 The routes to diagnosis varied distinctly between cancer networks. Adjusted rates of diagnosis  
23 after emergency admission ranged from 8.7% to 32.3%, and six networks fell outside the 99.8%  
24 funnel limits (Figure 1). There was also substantial variation between the networks in the  
25 adjusted rates of urgent (2WW) referral among patients diagnosed after any GP referral. Five  
26 networks had adjusted rates above 80%, while four had rates below 60%.

## 27 28 29 30 31 32 33 34 35 36 **DISCUSSION**

37  
38 This national study of 14,102 patients with O-G cancer adds to the limited evidence how routes  
39 to diagnosis are related to treatment outcomes. We found that only 45% of patients were  
40 diagnosed after an urgent (2WW) GP referral. Around 21% of patients were referred non-  
41 urgently by their GP which suggests their pattern of symptoms were not suggestive of cancer.

42  
43  
44  
45  
46  
47  
48 The remaining third were split evenly between diagnosis after an emergency admission and after  
49 referral by another hospital consultant. There was, however, substantial variation between cancer  
50 networks in the proportion of patients diagnosed via each route.  
51  
52  
53  
54  
55  
56  
57  
58  
59  
60

1  
2  
3 The importance of route to diagnosis is highlighted by its relationship to treatment intent and  
4 one-year survival. We found the proportion of patients planned to have curative treatment was  
5 considerably lower among patients diagnosed after an emergency admission (16%) compared to  
6 urgent (2WW) GP referrals (36%). This was partly due to differences in the characteristics of  
7 patients diagnosed via these routes, with more patients diagnosed after an emergency admission  
8 having advanced disease. This suggests that diagnosis after emergency admission is a marker for  
9 late diagnosis. In addition, this route to diagnostic occurred more frequently among patients with  
10 stomach rather than oesophageal (including junctional) cancer, and was also associated with  
11 increasing age, more co-morbidity and worse performance status.  
12  
13  
14  
15  
16  
17  
18  
19  
20  
21  
22  
23  
24  
25  
26

27 The proportion of urgent (2WW) GP referrals was significantly lower among patients aged under  
28 55 years and this may reflect the age criterion for urgent referral in the guideline on dyspepsia  
29 [9]. We also observed that the proportion of patients with curative treatment plans was lower  
30 among urgent (2WW) GP referrals compared to non-urgent referrals. This is probably due to the  
31 alarm symptoms which form the basis of the referral guidelines being associated with more  
32 advanced disease [12,13].  
33  
34  
35  
36  
37  
38  
39  
40  
41  
42

### 43 **Strengths and limitations**

44 The study was based on a large, prospective sample of patients diagnosed in 142 English NHS  
45 trusts, 92% of all trusts providing O-G cancer care. Route to diagnosis was defined using items  
46 from the English national cancer dataset and 1-year survival was known for all patients.  
47  
48  
49  
50  
51  
52  
53  
54

55 The study suffers from various limitations. First, using data from the routine Hospital Episode  
56 Statistics (HES) database, the overall audit was estimated to include 71% of patients diagnosed in  
57  
58  
59  
60

1  
2  
3 England during the data collection period [3]. Further excluding patient records and NHS trusts  
4 with missing data meant this analysis included 62% of all potential cases. The analysed Audit  
5 data and HES dataset showed similar demographic characteristics (average age was 71.4 and 71.3  
6 years, respectively, while the proportion of male patients was 67.2% and 66.3% respectively).  
7  
8 The differences between the analysed and excluded audit patients were also small. Excluded  
9 audit patients were slightly younger on average (69.7 v 71.4 years,  $p < 0.001$ ) but did not differ by  
10 a statistically significant amount in terms of patient sex (male 69.2% v 67.2%,  $p = 0.06$ ) or  
11 location of tumour (stomach 29.6% v 30.8%,  $p = 0.27$ ).  
12  
13  
14  
15  
16  
17  
18  
19  
20  
21  
22  
23

24 Another limitation was the variation in estimated case ascertainment between networks. Sixteen  
25 networks submitted data on over 70% of expected cases, while two submitted less than 40% of  
26 cases. Excluding records due to poor data quality produced marginal changes in case-  
27 ascertainment for most networks, with it being reduced by less than 5% for 19 networks.  
28  
29  
30  
31  
32  
33

34 Excluding the 10 NHS trusts because of poor route to diagnosis data affected six networks and  
35 reduced their case-ascertainment by between 11% and 42%. These exclusions could have biased  
36 the individual network rates if hospitals were selective in the patients submitted to the Audit  
37 and/or data completeness was related to particular patient characteristics. However, the routes to  
38 diagnosis within networks with high, medium and low case-ascertainment were not noticeably  
39 different, and selection bias is unlikely to explain the variation observed between networks.  
40  
41  
42  
43  
44  
45  
46  
47

48 Among the nine networks that submitted over 80% of estimated cases and that had less than 5%  
49 of records excluded for incomplete data, the adjusted proportion of patients diagnosed after a GP  
50 referral ranged from 52% to 71%, while the adjusted proportion of patients diagnosed after  
51 emergency admission ranged from 9% to 30%.  
52  
53  
54  
55  
56  
57  
58  
59  
60

1  
2  
3 A third limitation is that treatment intent was missing for 5% of the 14,102 patients. This might  
4  
5 introduce bias in the estimated relationship between referral source and treatment intent but this  
6  
7 is likely to be small compared to the size of the observed association.  
8  
9

10  
11  
12 Another limitation concerns the information available for risk-adjustment. Many factors can  
13  
14 influence decisions about treatment intent and one-year survival, and there may be residual  
15  
16 confounding caused by unmeasured variables such as the symptoms experienced at diagnosis  
17  
18 [26]. However, the analysis included important prognostic factors such as age, comorbidity,  
19  
20 performance status and stage of disease and residual confounding is unlikely to explain the  
21  
22 association between the outcomes and referral source. To incorporate performance status and  
23  
24 stage, the analysis used multiple imputation, which relies on the assumption that the data were  
25  
26 “missing at random”. This assumption seems plausible given the range of variables in the  
27  
28 imputation model (see additional document). Finally, the effect of the risk-adjustment on the  
29  
30 estimated network rates was comparatively small and it seems unlikely that the observed network  
31  
32 variation was due to inadequate risk-adjustment.  
33  
34  
35  
36  
37  
38  
39  
40

### 41 **Comparison with other studies**

42  
43 Various studies have examined the pathway to diagnosis, with many focusing on patients  
44  
45 diagnosed after an urgent (2WW) GP referral. In a systematic review, Thorne et al [27] derived  
46  
47 pooled data on 498 patients from seven studies conducted between 2003 and 2008, and estimated  
48  
49 that 34% of patients with upper gastro-intestinal cancer were diagnosed after urgent (2WW) GP  
50  
51 referral. An audit of cancer diagnosis in English primary care in 2009/10 [28] reported that the  
52  
53 proportion of patients with oesophageal cancer (n=596) diagnosed after an urgent (2WW) GP  
54  
55 referral and emergency presentation was 58% and 10% respectively; for stomach cancers  
56  
57  
58  
59  
60

1  
2  
3 (n=319), the proportions were 40% and 21%, respectively. The national study using English  
4  
5 Cancer Registry and routine health data [18] reported higher rates of emergency presentation  
6  
7 (22% for oesophageal and 33% for stomach) and lower rates of urgent (2WW) GP referrals (34%  
8  
9 for oesophageal and 23% for stomach).  
10  
11

12  
13  
14  
15 Our results are generally comparable to these estimates. Compared to the results derived from  
16  
17 routine national data [18], we found a higher proportion of diagnoses after urgent (2WW) GP  
18  
19 referral, and a lower proportion after emergency admission. These differences could arise for  
20  
21 various reasons. First, the audit may have suffered from potential under-reporting of patients  
22  
23 diagnosed via particular pathways. Second, the two studies used different pathway categories  
24  
25 and the “emergency admission” definition from the National Cancer dataset and the NCIN  
26  
27 definition of emergency presentation may not entirely overlap. Finally, the studies had distinct  
28  
29 methodologies. In deriving the results from the routine data, the researchers created eight routes  
30  
31 to diagnosis by grouping 71 distinct combinations [18].  
32  
33  
34  
35  
36  
37  
38

39 Few studies have examined the effect of the routes to diagnosis on outcomes for O-G cancer  
40  
41 patients. The results of our study are consistent with the evidence that patients diagnosed after  
42  
43 emergency have worse survival rates [16,18,29] but we are unaware of any previous study that  
44  
45 found, for patients diagnosed after referral by another consultant or non-urgent GP referral, their  
46  
47 risk-adjusted prognosis was not adversely affected.  
48  
49  
50

51  
52  
53 The reasons for patients being diagnosed after emergency admission are currently unclear.

54  
55 Various explanations have been proposed [29-32]. One suggestion is that these patients have  
56  
57 more aggressive forms of cancer than patients referred by GPs, or they were asymptomatic prior  
58  
59  
60

1  
2  
3 to presenting at A&E. Other explanations are linked to factors delaying diagnosis. Such delays  
4  
5 might be patient related (because the patients ignored their symptoms, did not wish to seek care  
6  
7 or did not recognise the seriousness of their symptoms) or might be practitioner related (due to  
8  
9 acid suppression treatment, previous negative tests, or initial mis-diagnosis) [32].  
10  
11

### 12 13 14 15 **Implications for clinical practice and future research**

16  
17 Recent government policy in England has focussed attention on the importance of an efficient  
18  
19 pathway to diagnosis by highlighting the worse survival rates for patients diagnosed after  
20  
21 emergency presentation [17]. This study provides additional insight into this relationship. That  
22  
23 patients diagnosed via this route are less likely to have a curative treatment plan compared to  
24  
25 urgent (2WW) GP referrals arises in part because more patients have advanced disease. Higher  
26  
27 rates of diagnosis after emergency admission were also associated with older patients, greater  
28  
29 frailty, and more co-morbidity.  
30  
31  
32

33  
34  
35  
36 Further work is required to determine how the risk of emergency admission can be lowered for  
37  
38 patients with these characteristics [30]. That the risk can be modified is implied by the variation  
39  
40 between cancer networks in the proportion of patients diagnosed after emergency admission. The  
41  
42 variation suggests the organisation of services and practices within some networks makes this  
43  
44 less likely. The lessons to be learnt from these networks require investigation at a local level so  
45  
46 that appropriate strategies can be devised.  
47  
48  
49

50  
51  
52  
53 This study also provides new information on outcomes for patients diagnosed after urgent  
54  
55 (2WW) and non-urgent GP referrals. The comparatively worse outcomes for patients referred  
56  
57 urgently is consistent with fact that the alarm symptoms used by current referral guidelines are  
58  
59  
60



1  
2  
3 associated with more advanced disease [12,13]. There was considerable variation between  
4  
5 cancer networks in the proportion of patients referred urgently among all GP referrals. The  
6  
7 reasons for this variation remain unknown but it may reflect the clinical uncertainty and debate  
8  
9 about the utility of these alarm symptoms as criteria for referral. Further research is required on  
10  
11 the symptom profiles of patients referred by GPs as well as causes of delays in diagnosis among  
12  
13 O-G cancer patients.  
14  
15  
16  
17  
18  
19  
20  
21  
22  
23  
24  
25  
26  
27  
28  
29  
30  
31  
32  
33  
34  
35  
36  
37  
38  
39  
40  
41  
42  
43  
44  
45  
46  
47  
48  
49  
50  
51  
52  
53  
54  
55  
56  
57  
58  
59  
60

## Acknowledgements

We would like to acknowledge the help of all of the health professionals and support personnel in English NHS trusts and Cancer Network for their efforts in submitting data to the Audit. We would also like to thank Steve Dean and Rose Napper of the Information Centre for Health and Social Care for their assistance in setting up and administering the Audit. No additional information is available.

## Financial disclosure

The Audit was commissioned by the Healthcare Quality Improvement Partnership (HQIP).

## Author contributions

TP, DC, RH, SR conceived the study; TP, DC, RH, SR, JG, JvdM designed the study; TP and DC conducted the statistical analyses; TP and DC wrote the manuscript; RH, SR, JG, JvdM commented on and revised drafts; DC is guarantor.

## Ethical approval

Under UK National Research Ethics Service guidance, this study constituted service evaluation and did not require ethics approval.

## Competing Interests

All authors have completed the Unified Competing Interest form at [http://www.icmje.org/coi\\_disclosure.pdf](http://www.icmje.org/coi_disclosure.pdf) (available on request from the corresponding author) and declare: support from Healthcare Quality Improvement Partnership (HQIP) for the submitted work; no financial relationships with any organisations that might have an interest in the submitted work in the previous three years, no other relationships or activities that could appear to have influenced the submitted work."

Table 1: Proportions of patients with oesophago-gastric cancer by the route to diagnosis.

|                               |                   | Patients | (%)  | Route to diagnosis (%) |                     |                | p-value |
|-------------------------------|-------------------|----------|------|------------------------|---------------------|----------------|---------|
|                               |                   |          |      | GP Referral            | Emergency admission | Other hospital |         |
| All patients                  |                   | 14,102   |      | 66                     | 16                  | 17             |         |
| Tumour                        | Oesophagus        | 9,755    | (69) | 71                     | 13                  | 16             | p<0.01  |
|                               | Stomach           | 4,347    | (31) | 56                     | 24                  | 19             |         |
| Gender                        | Female            | 4,631    | (33) | 66                     | 18                  | 17             | p=0.02  |
|                               | Male              | 9,471    | (67) | 67                     | 16                  | 18             |         |
| Age (years)                   | Under 55          | 1,215    | ( 9) | 66                     | 14                  | 20             | p<0.01  |
|                               | 55 to 64          | 2,567    | (18) | 72                     | 11                  | 17             |         |
|                               | 65 to 74          | 4,093    | (29) | 69                     | 13                  | 19             |         |
|                               | 75 to 84          | 4,465    | (32) | 65                     | 18                  | 17             |         |
|                               | 85 & over         | 1,762    | (12) | 58                     | 30                  | 12             |         |
| Index of Multiple Deprivation | 1 (Least)         | 2,498    | (18) | 70                     | 14                  | 16             | p<0.01  |
|                               | 2                 | 2,814    | (20) | 68                     | 16                  | 16             |         |
|                               | 3                 | 2,969    | (21) | 68                     | 15                  | 17             |         |
|                               | 4                 | 2,879    | (20) | 64                     | 19                  | 17             |         |
|                               | 5 (Most)          | 2,942    | (21) | 62                     | 18                  | 20             |         |
| Comorbidities                 | 0                 | 7,870    | (56) | 70                     | 14                  | 16             | p<0.01  |
|                               | 1                 | 3,829    | (27) | 65                     | 17                  | 18             |         |
|                               | 2                 | 1,676    | (12) | 59                     | 21                  | 19             |         |
|                               | 3 or more         | 727      | ( 5) | 54                     | 25                  | 21             |         |
| Performance Status            | 0                 | 3,541    | (25) | 74                     | 8                   | 19             | p<0.01  |
|                               | 1                 | 2,838    | (20) | 70                     | 12                  | 18             |         |
|                               | 2                 | 1,926    | (14) | 63                     | 20                  | 18             |         |
|                               | 3 or 4            | 1,812    | (13) | 48                     | 36                  | 16             |         |
|                               | Missing           | 3,985    | (28) | 67                     | 16                  | 16             |         |
| Pre-treatment Stage           | 1 or 2            | 2,543    | (18) | 64                     | 13                  | 22             | p<0.01  |
|                               | 3                 | 2,296    | (16) | 74                     | 11                  | 16             |         |
|                               | 4                 | 3,804    | (27) | 67                     | 20                  | 14             |         |
|                               | Unknown / missing | 5,459    | (39) | 64                     | 18                  | 18             |         |

Table 2: Relationship between route to diagnosis, curative treatment intent and 1-year survival among patients diagnosed with O-G cancer in English NHS trusts.

| Referral Source                        | Patients | Patients with outcome (%) | Unadjusted odds ratio* | Adjusted odds ratio‡ (95%CI) |
|----------------------------------------|----------|---------------------------|------------------------|------------------------------|
| <i>Patients with curative intent</i>   |          |                           |                        |                              |
| GP referral: urgent                    | 6,084    | 2,167 (36)                | 1                      | 1                            |
| GP referral: non-urgent                | 2,759    | 1,096 (40)                | 1.19                   | 1.02 0.90 to 1.15            |
| Emergency admission                    | 2,178    | 359 (16)                  | 0.36                   | 0.62 0.52 to 0.74            |
| Other hospital referral                | 2,326    | 1,059 (46)                | 1.51                   | 1.38 1.21 to 1.58            |
| All patients                           | 13,347   | 4,681 (35)                |                        |                              |
| <i>Patients who survive 1 year (%)</i> |          |                           |                        |                              |
| GP referral: urgent                    | 6,438    | 2,763 (43)                | 1                      | 1                            |
| GP referral: non-urgent                | 2,913    | 1,413 (49)                | 1.25                   | 1.11 1.00 to 1.24            |
| Emergency admission                    | 2,311    | 617 (27)                  | 0.48                   | 0.78 0.68 to 0.89            |
| Other hospital referral                | 2,440    | 1,288 (53)                | 1.49                   | 1.33 1.18 to 1.50            |
| All patients                           | 14,102   | 6,081 (43)                |                        |                              |

\*Odds ratio with GP referral: urgent as the baseline category.

‡ Adjusted odds ratio estimated using multiple logistic regression, adjusting for patients' age group, sex, tumour site, stage, number of comorbidities, performance status and regional deprivation.

1  
2  
3  
4  
5  
6  
7  
8  
9  
10  
11  
12  
13  
14  
15  
16  
17  
18  
19  
20  
21  
22  
23  
24  
25  
26  
27  
28  
29  
30  
31  
32  
33  
34  
35  
36  
37  
38  
39  
40  
41  
42  
43  
44  
45  
46  
47  
48  
49  
50  
51  
52  
53  
54  
55  
56  
57  
58  
59  
60

Figure 1: Proportion of patients referred after an emergency admission for the 30 English cancer networks, adjusted for patient age, sex, tumour site, comorbidities, performance status and regional deprivation

[Figure 1]

For peer review only

## References

1. Cancer Research UK Statistical Information Team 2011. Common cancers - UK mortality statistics. Accessed on 26/04/2011.  
<http://info.cancerresearchuk.org/cancerstats/mortality/cancerdeaths/>.
2. Scottish Audit of Gastro-oesophageal Cancer Steering Group. Gilbert FJ, Park KGM, Thompson AM. Scottish Audit of Gastro-oesophageal Cancer. Edinburgh: Information & Statistics Division, NHS Scotland, 2002
3. Cromwell DA, Palser TR, van der Meulen J, et al. The National Oesophago-Gastric Cancer Audit: Third Annual Report. Leeds: The NHS Information Centre, 2010
4. Office for National Statistics. Cancer survival in England - Patients diagnosed 2004–2008, followed up to 2009. Accessed on 26/04/2011.  
<http://www.statistics.gov.uk/pdfdir/can0411.pdf>
5. Richards MA. The national awareness and early diagnosis initiative in England: assembling the evidence. *Br J Cancer* 2009;101 Suppl 2:S1-S4.
6. Department of Health. Guidance on Commissioning Cancer Services: Improving Outcomes in Upper Gastro-Intestinal Cancers: The Manual. London: Department of Health, 2001
7. Bodger K, Eastwood PG, Manning SI, et al. Dyspepsia workload in urban general practice and implications of the British Society of Gastroenterology Dyspepsia guidelines. *Aliment Pharmacol Ther* 2000;14:413-20.
8. Heikkinen M, Pikkarainen P, Takala J, et al. General practitioners' approach to dyspepsia. Survey of consultation frequencies, treatment, and investigations. *Scand J Gastroenterol* 1996;31:648-53.
9. North of England Dyspepsia Guideline Development Group. Dyspepsia: managing dyspepsia in primary care. London: National Institute of Clinical Excellence, 2004.
10. National Collaborating Centre for Primary Care. Referral Guidelines for Suspected Cancer in Adults and Children. London: National Institute of Clinical Excellence, 2005.
11. Scottish Intercollegiate Guidelines Network. SIGN 87 - Management of oesophageal and gastric cancer. Edinburgh: SIGN, 2006.

12. Bowrey DJ, Griffin SM, Wayman J, et al. Use of alarm symptoms to select dyspeptics for endoscopy causes patients with curable esophagogastric cancer to be overlooked. *Surg Endosc* 2006;20:1725-8.
13. Meineche-Schmidt V, Jorgensen T. 'Alarm symptoms' in patients with dyspepsia: a three-year prospective study from general practice. *Scand J Gastroenterol* 2002;37:999-1007.
14. National Audit Office. *Delivering the Cancer Reform Strategy*. London: NAO, 2010.
15. Department of Health. *The Cancer Reform Strategy*. London: Department of Health, 2007
16. National Cancer Intelligence Network (NCIN). *Routes to Diagnosis – NCIN Data Briefing*. [http://www.ncin.org.uk/publications/data\\_briefings/routes\\_to\\_diagnosis.aspx](http://www.ncin.org.uk/publications/data_briefings/routes_to_diagnosis.aspx) Accessed on 28 January 2011.
17. Department of Health. *Improving outcomes: a strategy for cancer*. London: Department of Health, 2011.
18. Elliss-Brookes L, McPhail S, Ives A, Greenslade M, Shelton J, Hiom S, Richards M. Routes to diagnosis for cancer - determining the patient journey using multiple routine data sets. *Br J Cancer*. 2012; 107(8): 1220-6.
19. Palsler TR, Cromwell DA, van der Meulen J, et al. *The National Oesophago-Gastric Cancer Audit: Second Annual Report*. Leeds: The NHS Information Centre, 2009.
20. The NHS Information Centre. *Cancer Dataset Project. Cancer Data Manual. Version 4.5*, Leeds: The NHS Information Centre, 2006.
21. Sobin LH, Wittekind C (ed). *TNM Classification of Malignant Tumours*, International Union against Cancer (UICC), 6<sup>th</sup> edition. New York: Wiley-Liss, 2002.
22. Office of the Deputy Prime Minister (2004). *The English Indices of Deprivation 2004: Summary (revised)*. <http://webarchive.nationalarchives.gov.uk/20100410180038/http://www.communities.gov.uk/archived/publications/communities/indicesdeprivation>. Accessed: 1/11/2009
23. Hosmer DW, Lemeshow S. *Applied Logistic Regression, 2nd Edition*. Chichester: Wiley & Sons, 2000.
24. Spiegelhalter DJ. Funnel plots for comparing institutional performance. *Stat Med* 2005;24:1185-202
25. Royston P. Multiple imputation of missing values: Update of ICE. *Stata J* 2005;5:527-36.

- 1  
2  
3 26. Hippisley-Cox J, Coupland C. Identifying patients with suspected gastro-oesophageal cancer  
4 in primary care: derivation and validation of an algorithm. *Br J Gen Pract.* 2011;61:707-14.  
5
- 6  
7 27. Thorne K, Hutchings H, Elwyn G. The two-week rule for NHS gastrointestinal cancer  
8 referrals: a systematic review of diagnostic effectiveness. *Open Colorectal Cancer J* 2009; 2:  
9 27-33  
10
- 11  
12 28. Rubin G, McPhail S, Elliott K. National Audit of Cancer Diagnosis in Primary Care. London:  
13 Royal College of General Practitioners, 2011.  
14
- 15  
16 29. Blackshaw GR, Stephens MR, Lewis WG, et al. Prognostic significance of acute presentation  
17 with emergency complications of gastric cancer. *Gastric Cancer* 2004;7:91-6.  
18
- 19  
20 30. Hamilton W. Emergency admissions of cancer as a marker of diagnostic delay. *Br J Cancer.*  
21 2012; 107(8): 1205-6  
22
- 23  
24 31. Bottle A, Tsang C, Parsons C, Majeed A, Soljak M, Aylin P. Association between patient  
25 and general practice characteristics and unplanned first-time admissions for cancer:  
26 observational study. *Br J Cancer.* 2012; 107(8):1213-9  
27
- 28  
29 32. MacDonald S, Macleod U, Campbell NC, et al. Systematic review of factors influencing  
30 patient and practitioner delay in diagnosis of upper gastrointestinal cancer. *Br J Cancer*  
31 2006;94:1272–80.  
32  
33  
34  
35  
36  
37  
38  
39  
40  
41  
42  
43  
44  
45  
46  
47  
48  
49  
50  
51  
52  
53  
54  
55  
56  
57  
58  
59  
60



1  
2  
3  
4  
5  
6  
7  
8  
9  
10  
11  
12  
13  
14  
15  
16  
17  
18  
19  
20  
21  
22  
23  
24  
25  
26  
27  
28  
29  
30  
31  
32  
33  
34  
35  
36  
37  
38  
39  
40  
41  
42  
43  
44  
45  
46  
47  
48  
49  
50  
51  
52  
53  
54  
55  
56  
57  
58  
59  
60

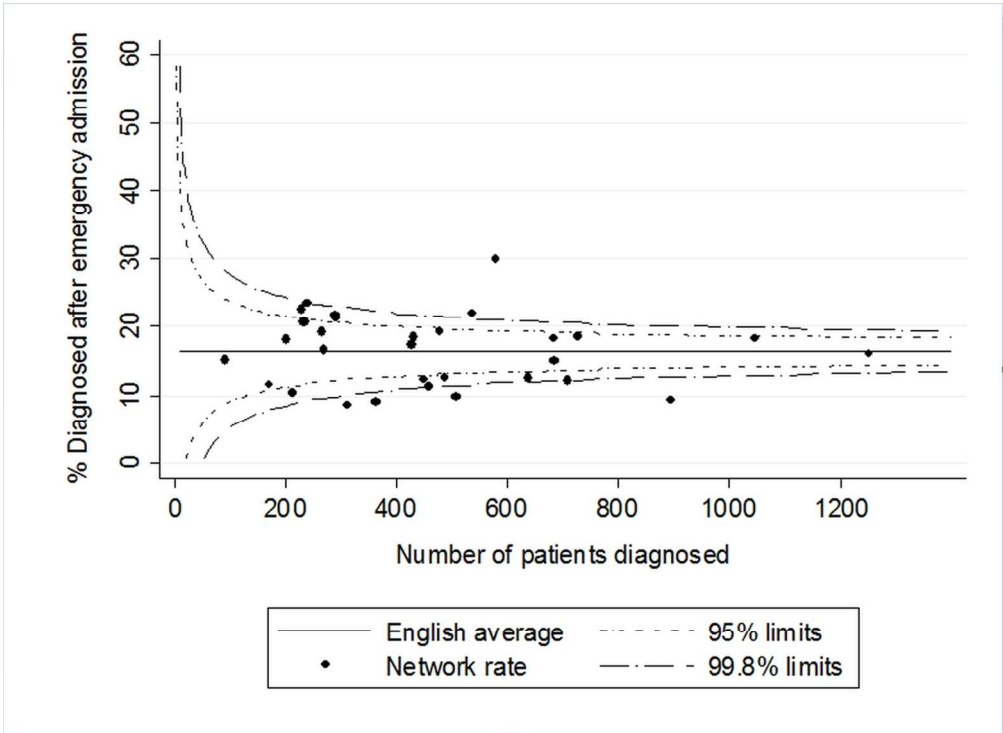

123x90mm (300 x 300 DPI)

Review only

## SUPPLEMENTARY INFORMATION

### Appendix 1: Information about patient characteristics and missing values and the effect of multiple-imputation on the estimates of logistic regression models

Table A1: Performance status at diagnosis across patient characteristics, before and after imputation

| Patient characteristic          |                           | Performance status |     |     |     |    | Unknown |
|---------------------------------|---------------------------|--------------------|-----|-----|-----|----|---------|
|                                 |                           | 0                  | 1   | 2   | 3   | 4  |         |
| Tumour                          | Oesophagus                | 27%                | 20% | 13% | 9%  | 2% | 29%     |
|                                 | Stomach                   | 21%                | 20% | 15% | 14% | 3% | 27%     |
| Gender                          | Female                    | 21%                | 20% | 15% | 12% | 3% | 29%     |
|                                 | Male                      | 27%                | 20% | 13% | 10% | 2% | 28%     |
| Age (years)                     | Under 55                  | 46%                | 17% | 7%  | 4%  | 1% | 26%     |
|                                 | 55 to 64                  | 42%                | 20% | 8%  | 4%  | 1% | 26%     |
|                                 | 65 to 74                  | 28%                | 24% | 13% | 8%  | 1% | 27%     |
|                                 | 75 to 84                  | 15%                | 21% | 18% | 13% | 3% | 30%     |
|                                 | 85 & over                 | 6%                 | 12% | 17% | 25% | 6% | 33%     |
| Index of Multiple Deprivation   | 1 (Least)                 | 28%                | 18% | 11% | 9%  | 2% | 32%     |
|                                 | 2                         | 27%                | 19% | 12% | 9%  | 3% | 30%     |
|                                 | 3                         | 26%                | 20% | 13% | 10% | 2% | 29%     |
|                                 | 4                         | 23%                | 22% | 15% | 11% | 2% | 26%     |
|                                 | 5 (Most)                  | 22%                | 21% | 17% | 13% | 3% | 25%     |
| Comorbidities                   | 0                         | 28%                | 16% | 9%  | 7%  | 1% | 38%     |
|                                 | 1                         | 25%                | 26% | 17% | 12% | 3% | 17%     |
|                                 | 2                         | 17%                | 24% | 22% | 18% | 4% | 15%     |
|                                 | 3 or more                 | 9%                 | 23% | 25% | 24% | 4% | 15%     |
| Performance status distribution |                           |                    |     |     |     |    |         |
|                                 | Before imputation (all)   | 25%                | 20% | 14% | 11% | 2% | 28%     |
|                                 | Before imputation (known) | 35%                | 28% | 19% | 15% | 3% |         |
|                                 | Imputed values            | 35%                | 28% | 19% | 14% | 3% |         |

Table A2: Pre-treatment (clinical) stage across patient characteristics, before and after imputation

| Patient characteristic           |            | Pre-treatment stage |     |     |     |         |
|----------------------------------|------------|---------------------|-----|-----|-----|---------|
|                                  |            | 1                   | 2   | 3   | 4   | Unknown |
| Tumour                           | Oesophagus | 3%                  | 14% | 19% | 26% | 37%     |
|                                  | Stomach    | 11%                 | 8%  | 11% | 29% | 42%     |
| Gender                           | Female     | 6%                  | 12% | 15% | 25% | 42%     |
|                                  | Male       | 5%                  | 13% | 17% | 28% | 37%     |
| Age (years)                      | Under 55   | 7%                  | 11% | 18% | 33% | 31%     |
|                                  | 55 to 64   | 5%                  | 14% | 20% | 29% | 32%     |
|                                  | 65 to 74   | 6%                  | 14% | 18% | 27% | 35%     |
|                                  | 75 to 84   | 6%                  | 12% | 14% | 27% | 41%     |
|                                  | 85 & over  | 5%                  | 8%  | 10% | 19% | 57%     |
| Index of Multiple Deprivation    | 1 (Least)  | 5%                  | 12% | 16% | 28% | 39%     |
|                                  | 2          | 6%                  | 13% | 16% | 26% | 38%     |
|                                  | 3          | 6%                  | 13% | 16% | 26% | 40%     |
|                                  | 4          | 6%                  | 13% | 15% | 27% | 39%     |
|                                  | 5 (Most)   | 6%                  | 11% | 17% | 28% | 38%     |
| Comorbidities                    | 0          | 5%                  | 11% | 15% | 27% | 42%     |
|                                  | 1          | 6%                  | 14% | 19% | 28% | 34%     |
|                                  | 2          | 7%                  | 17% | 17% | 25% | 34%     |
|                                  | 3 or more  | 11%                 | 15% | 16% | 24% | 34%     |
| Performance Status               | 0          | 8%                  | 17% | 24% | 22% | 29%     |
|                                  | 1          | 6%                  | 16% | 19% | 29% | 30%     |
|                                  | 2          | 5%                  | 12% | 16% | 33% | 34%     |
|                                  | 3          | 5%                  | 9%  | 10% | 35% | 41%     |
|                                  | 4          | 4%                  | 8%  | 5%  | 35% | 47%     |
|                                  | Unknown    | 4%                  | 8%  | 11% | 23% | 54%     |
| Pre-treatment Stage distribution |            |                     |     |     |     |         |
| Before imputation (all)          |            | 6%                  | 12% | 16% | 27% | 39%     |
| Before imputation (known)        |            | 9%                  | 20% | 27% | 44% |         |
| Imputed values                   |            | 9%                  | 20% | 26% | 45% |         |

Table A3: Results of logistic regression models for association between patient characteristics and odds of patients having a curative treatment plan

|                               |                         | Odds ratios of coefficients in regression model |             |                         |                        |
|-------------------------------|-------------------------|-------------------------------------------------|-------------|-------------------------|------------------------|
|                               |                         | Unadjusted                                      | Basic model | Model with imputed data | Complete case analysis |
| Route to                      | Urgent GP referral      | 1                                               | 1           | 1                       | 1                      |
| Diagnosis                     | Non-urgent GP referral  | 1.19                                            | 1.16        | 1.02                    | 1.00                   |
|                               | Emergency admission     | 0.36                                            | 0.43        | 0.62                    | 0.68                   |
|                               | Other hospital referral | 1.51                                            | 1.53        | 1.38                    | 1.30                   |
| Tumour                        | Oesophagus              |                                                 | 1           | 1                       | 1                      |
|                               | Stomach                 |                                                 | 1.19        | 1.34                    | 1.63                   |
| Gender                        | Female                  |                                                 | 1           | 1                       | 1                      |
|                               | Male                    |                                                 | 1.16        | 1.19                    | 1.31                   |
| Age (years)                   | Under 55                |                                                 | 1.21        | 1.14                    | 1.37                   |
|                               | 55 to 64                |                                                 | 1.34        | 1.25                    | 1.48                   |
|                               | 65 to 74                |                                                 | 1           | 1                       | 1                      |
|                               | 75 to 84                |                                                 | 0.41        | 0.43                    | 0.34                   |
|                               | 85 & over               |                                                 | 0.07        | 0.08                    | 0.08                   |
| Index of Multiple Deprivation | 1 (Least)               |                                                 | 1           | 1                       | 1                      |
|                               | 2                       |                                                 | 1.10        | 1.09                    | 1.12                   |
|                               | 3                       |                                                 | 0.93        | 0.92                    | 0.90                   |
|                               | 4                       |                                                 | 0.96        | 0.98                    | 1.06                   |
|                               | 5 (Most)                |                                                 | 0.82        | 0.91                    | 0.93                   |
| No. of comorbidities          |                         |                                                 | 0.92        | 0.92                    | 0.82                   |
| Performance Status            | 0                       |                                                 |             | 1                       | 1                      |
|                               | 1                       |                                                 |             | 0.56                    | 0.49                   |
|                               | 2                       |                                                 |             | 0.28                    | 0.18                   |
|                               | 3 or 4                  |                                                 |             | 0.10                    | 0.03                   |
| Pre-treatment Stage           | 1                       |                                                 |             | 2.01                    | 3.22                   |
|                               | 2                       |                                                 |             | 1.62                    | 2.23                   |
|                               | 3                       |                                                 |             | 1                       | 1                      |
|                               | 4                       |                                                 |             | 0.15                    | 0.04                   |
| Area under the curve          |                         |                                                 | 0.72        | 0.86                    | 0.92                   |

Table A4: Results of logistic regression models for association between patient characteristics and odds of patients surviving one year

|                               |                         | Odds ratios of coefficients in regression model |             |                         |                        |
|-------------------------------|-------------------------|-------------------------------------------------|-------------|-------------------------|------------------------|
|                               |                         | Unadjusted                                      | Basic model | Model with imputed data | Complete case analysis |
| Route to                      | Urgent GP referral      | 1                                               | 1           | 1                       | 1                      |
| Diagnosis                     | Non-urgent GP referral  | 1.25                                            | 1.23        | 1.11                    | 1.12                   |
|                               | Emergency admission     | 0.48                                            | 0.55        | 0.78                    | 0.85                   |
|                               | Other hospital referral | 1.49                                            | 1.48        | 1.33                    | 1.48                   |
| Tumour                        | Oesophagus              |                                                 | 1           | 1                       | 1                      |
|                               | Stomach                 |                                                 | 1.09        | 1.11                    | 1.11                   |
| Gender                        | Female                  |                                                 | 1           | 1                       | 1                      |
|                               | Male                    |                                                 | 1.03        | 1.01                    | 0.98                   |
| Age (years)                   | Under 55                |                                                 | 1.24        | 1.14                    | 1.12                   |
|                               | 55 to 64                |                                                 | 1.29        | 1.18                    | 1.16                   |
|                               | 65 to 74                |                                                 | 1           | 1                       | 1                      |
|                               | 75 to 84                |                                                 | 0.58        | 0.68                    | 0.66                   |
|                               | 85 & over               |                                                 | 0.34        | 0.47                    | 0.53                   |
| Index of Multiple Deprivation | 1 (Least)               |                                                 | 1           | 1                       | 1                      |
|                               | 2                       |                                                 | 1.10        | 1.10                    | 1.19                   |
|                               | 3                       |                                                 | 1.06        | 1.10                    | 1.11                   |
|                               | 4                       |                                                 | 0.98        | 1.02                    | 1.14                   |
|                               | 5 (Most)                |                                                 | 0.88        | 0.99                    | 1.02                   |
| No. of comorbidities          |                         |                                                 | 1.01        | 1.03                    | 1.02                   |
| Performance Status            | 0                       |                                                 |             | 1                       | 1                      |
|                               | 1                       |                                                 |             | 0.58                    | 0.59                   |
|                               | 2                       |                                                 |             | 0.34                    | 0.33                   |
|                               | 3 or 4                  |                                                 |             | 0.18                    | 0.14                   |
| Pre-treatment Stage           | 1                       |                                                 |             | 2.92                    | 3.37                   |
|                               | 2                       |                                                 |             | 1.70                    | 1.64                   |
|                               | 3                       |                                                 |             | 1                       | 1                      |
|                               | 4                       |                                                 |             | 0.31                    | 0.30                   |
| Area under the curve          |                         |                                                 | 0.65        | 0.79                    | 0.80                   |

STROBE 2007 (v4) Statement—Checklist of items that should be included in reports of *cohort studies*

| Section/Topic                | Item # | Recommendation                                                                                                                                                                       | Reported on page #                    |
|------------------------------|--------|--------------------------------------------------------------------------------------------------------------------------------------------------------------------------------------|---------------------------------------|
| Title and abstract           | 1      | (a) Indicate the study's design with a commonly used term in the title or the abstract                                                                                               | Cohort design in abstract.            |
|                              |        | (b) Provide in the abstract an informative and balanced summary of what was done and what was found                                                                                  | 2                                     |
| <b>Introduction</b>          |        |                                                                                                                                                                                      |                                       |
| Background/rationale         | 2      | Explain the scientific background and rationale for the investigation being reported                                                                                                 | 4                                     |
| Objectives                   | 3      | State specific objectives, including any prespecified hypotheses                                                                                                                     | 5                                     |
| <b>Methods</b>               |        |                                                                                                                                                                                      |                                       |
| Study design                 | 4      | Present key elements of study design early in the paper                                                                                                                              | 5                                     |
| Setting                      | 5      | Describe the setting, locations, and relevant dates, including periods of recruitment, exposure, follow-up, and data collection                                                      | 5-6                                   |
| Participants                 | 6      | (a) Give the eligibility criteria, and the sources and methods of selection of participants. Describe methods of follow-up                                                           | 5-6                                   |
|                              |        | (b) For matched studies, give matching criteria and number of exposed and unexposed                                                                                                  | n/a                                   |
| Variables                    | 7      | Clearly define all outcomes, exposures, predictors, potential confounders, and effect modifiers.                                                                                     | 5-6                                   |
| Data sources/<br>measurement | 8*     | For each variable of interest, give sources of data and details of methods of assessment (measurement). Describe comparability of assessment methods if there is more than one group | 5                                     |
| Bias                         | 9      | Describe any efforts to address potential sources of bias                                                                                                                            | 6                                     |
| Study size                   | 10     | Explain how the study size was arrived at                                                                                                                                            | Aimed to collect all cases in England |
| Quantitative variables       | 11     | Explain how quantitative variables were handled in the analyses. If applicable, describe which groupings were chosen and why                                                         | 6                                     |
| Statistical methods          | 12     | (a) Describe all statistical methods, including those used to control for confounding                                                                                                | 6-7                                   |
|                              |        | (b) Describe any methods used to examine subgroups and interactions                                                                                                                  | 6                                     |
|                              |        | (c) Explain how missing data were addressed                                                                                                                                          | 7                                     |
|                              |        | (d) If applicable, explain how loss to follow-up was addressed                                                                                                                       | n/a                                   |
|                              |        | (e) Describe any sensitivity analyses                                                                                                                                                | n/a                                   |

| <b>Results</b>           |     |                                                                                                                                                                                                              |                      |
|--------------------------|-----|--------------------------------------------------------------------------------------------------------------------------------------------------------------------------------------------------------------|----------------------|
| Participants             | 13* | (a) Report numbers of individuals at each stage of study—eg numbers potentially eligible, examined for eligibility, confirmed eligible, included in the study, completing follow-up, and analysed            | 7                    |
|                          |     | (b) Give reasons for non-participation at each stage                                                                                                                                                         | n/a                  |
|                          |     | (c) Consider use of a flow diagram                                                                                                                                                                           | Not warranted        |
| Descriptive data         | 14* | (a) Give characteristics of study participants (eg demographic, clinical, social) and information on exposures and potential confounders                                                                     | Table 1 and appendix |
|                          |     | (b) Indicate number of participants with missing data for each variable of interest                                                                                                                          | Appendix             |
|                          |     | (c) Summarise follow-up time (eg, average and total amount)                                                                                                                                                  | Table 2              |
| Outcome data             | 15* | Report numbers of outcome events or summary measures over time                                                                                                                                               | n/a                  |
| Main results             | 16  | (a) Give unadjusted estimates and, if applicable, confounder-adjusted estimates and their precision (eg, 95% confidence interval). Make clear which confounders were adjusted for and why they were included | Tables 1 and 2       |
|                          |     | (b) Report category boundaries when continuous variables were categorized                                                                                                                                    | Table 1              |
|                          |     | (c) If relevant, consider translating estimates of relative risk into absolute risk for a meaningful time period                                                                                             | n/a                  |
| Other analyses           | 17  | Report other analyses done—eg analyses of subgroups and interactions, and sensitivity analyses                                                                                                               | Appendix             |
| <b>Discussion</b>        |     |                                                                                                                                                                                                              |                      |
| Key results              | 18  | Summarise key results with reference to study objectives                                                                                                                                                     | 9                    |
| <b>Limitations</b>       |     |                                                                                                                                                                                                              |                      |
| Interpretation           | 20  | Give a cautious overall interpretation of results considering objectives, limitations, multiplicity of analyses, results from similar studies, and other relevant evidence                                   | 10-11                |
| Generalisability         | 21  | Discuss the generalisability (external validity) of the study results                                                                                                                                        | 11-13                |
| <b>Other information</b> |     |                                                                                                                                                                                                              |                      |
| Funding                  | 22  | Give the source of funding and the role of the funders for the present study and, if applicable, for the original study on which the present article is based                                                | 14                   |

\*Give information separately for cases and controls in case-control studies and, if applicable, for exposed and unexposed groups in cohort and cross-sectional studies.

**Note:** An Explanation and Elaboration article discusses each checklist item and gives methodological background and published examples of transparent reporting. The STROBE checklist is best used in conjunction with this article (freely available on the Web sites of PLoS Medicine at <http://www.plosmedicine.org/>, Annals of Internal Medicine at <http://www.annals.org/>, and Epidemiology at <http://www.epidem.com/>). Information on the STROBE Initiative is available at [www.strobe-statement.org](http://www.strobe-statement.org).
