# Supplementary material for: Impact of route to diagnosis on treatment intent and 1-year survival in patients diagnosed with oesophagogastric cancer in England: a prospective cohort study
Source: HighWire-hosted journal article supplement (doi:10.1136/bmjopen-2012-002129), 2013-01-01
Supplement: bmjopen-2012-002129supp_appendix.pdf [file bmjopen-2012-002129supp_appendix.pdf]

## SUPPLEMENTARY INFORMATION

### Appendix 1: Information about patient characteristics and missing values and the effect of multiple-imputation on the estimates of logistic regression models

Table A1: Performance status at diagnosis across patient characteristics, before and after imputation

| Patient characteristic          |            | Performance status |     |     |     |    |         |
|---------------------------------|------------|--------------------|-----|-----|-----|----|---------|
|                                 |            | 0                  | 1   | 2   | 3   | 4  | Unknown |
| Tumour                          | Oesophagus | 27%                | 20% | 13% | 9%  | 2% | 29%     |
|                                 | Stomach    | 21%                | 20% | 15% | 14% | 3% | 27%     |
| Gender                          | Female     | 21%                | 20% | 15% | 12% | 3% | 29%     |
|                                 | Male       | 27%                | 20% | 13% | 10% | 2% | 28%     |
| Age (years)                     | Under 55   | 46%                | 17% | 7%  | 4%  | 1% | 26%     |
|                                 | 55 to 64   | 42%                | 20% | 8%  | 4%  | 1% | 26%     |
|                                 | 65 to 74   | 28%                | 24% | 13% | 8%  | 1% | 27%     |
|                                 | 75 to 84   | 15%                | 21% | 18% | 13% | 3% | 30%     |
|                                 | 85 & over  | 6%                 | 12% | 17% | 25% | 6% | 33%     |
| Index of Multiple Deprivation   | 1 (Least)  | 28%                | 18% | 11% | 9%  | 2% | 32%     |
|                                 | 2          | 27%                | 19% | 12% | 9%  | 3% | 30%     |
|                                 | 3          | 26%                | 20% | 13% | 10% | 2% | 29%     |
|                                 | 4          | 23%                | 22% | 15% | 11% | 2% | 26%     |
|                                 | 5 (Most)   | 22%                | 21% | 17% | 13% | 3% | 25%     |
| Comorbidities                   | 0          | 28%                | 16% | 9%  | 7%  | 1% | 38%     |
|                                 | 1          | 25%                | 26% | 17% | 12% | 3% | 17%     |
|                                 | 2          | 17%                | 24% | 22% | 18% | 4% | 15%     |
|                                 | 3 or more  | 9%                 | 23% | 25% | 24% | 4% | 15%     |
| Performance status distribution |            |                    |     |     |     |    |         |
| Before imputation (all)         |            | 25%                | 20% | 14% | 11% | 2% | 28%     |
| Before imputation (known)       |            | 35%                | 28% | 19% | 15% | 3% |         |
| Imputed values                  |            | 35%                | 28% | 19% | 14% | 3% |         |

Table A2: Pre-treatment (clinical) stage across patient characteristics, before and after imputation

| Patient characteristic           |            | Pre-treatment stage |     |     |     |         |
|----------------------------------|------------|---------------------|-----|-----|-----|---------|
|                                  |            | 1                   | 2   | 3   | 4   | Unknown |
| Tumour                           | Oesophagus | 3%                  | 14% | 19% | 26% | 37%     |
|                                  | Stomach    | 11%                 | 8%  | 11% | 29% | 42%     |
| Gender                           | Female     | 6%                  | 12% | 15% | 25% | 42%     |
|                                  | Male       | 5%                  | 13% | 17% | 28% | 37%     |
| Age (years)                      | Under 55   | 7%                  | 11% | 18% | 33% | 31%     |
|                                  | 55 to 64   | 5%                  | 14% | 20% | 29% | 32%     |
|                                  | 65 to 74   | 6%                  | 14% | 18% | 27% | 35%     |
|                                  | 75 to 84   | 6%                  | 12% | 14% | 27% | 41%     |
|                                  | 85 & over  | 5%                  | 8%  | 10% | 19% | 57%     |
| Index of Multiple Deprivation    | 1 (Least)  | 5%                  | 12% | 16% | 28% | 39%     |
|                                  | 2          | 6%                  | 13% | 16% | 26% | 38%     |
|                                  | 3          | 6%                  | 13% | 16% | 26% | 40%     |
|                                  | 4          | 6%                  | 13% | 15% | 27% | 39%     |
|                                  | 5 (Most)   | 6%                  | 11% | 17% | 28% | 38%     |
| Comorbidities                    | 0          | 5%                  | 11% | 15% | 27% | 42%     |
|                                  | 1          | 6%                  | 14% | 19% | 28% | 34%     |
|                                  | 2          | 7%                  | 17% | 17% | 25% | 34%     |
|                                  | 3 or more  | 11%                 | 15% | 16% | 24% | 34%     |
| Performance Status               | 0          | 8%                  | 17% | 24% | 22% | 29%     |
|                                  | 1          | 6%                  | 16% | 19% | 29% | 30%     |
|                                  | 2          | 5%                  | 12% | 16% | 33% | 34%     |
|                                  | 3          | 5%                  | 9%  | 10% | 35% | 41%     |
|                                  | 4          | 4%                  | 8%  | 5%  | 35% | 47%     |
|                                  | Unknown    | 4%                  | 8%  | 11% | 23% | 54%     |
| Pre-treatment Stage distribution |            |                     |     |     |     |         |
| Before imputation (all)          |            | 6%                  | 12% | 16% | 27% | 39%     |
| Before imputation (known)        |            | 9%                  | 20% | 27% | 44% |         |
| Imputed values                   |            | 9%                  | 20% | 26% | 45% |         |

Table A3: Results of logistic regression models for association between patient characteristics and odds of patients having a curative treatment plan

|                               |                         | Odds ratios of coefficients in regression model |             |                         |                        |
|-------------------------------|-------------------------|-------------------------------------------------|-------------|-------------------------|------------------------|
|                               |                         | Unadjusted                                      | Basic model | Model with imputed data | Complete case analysis |
| Route to Diagnosis            | Urgent GP referral      | 1                                               | 1           | 1                       | 1                      |
|                               | Non-urgent GP referral  | 1.19                                            | 1.16        | 1.02                    | 1.00                   |
|                               | Emergency admission     | 0.36                                            | 0.43        | 0.62                    | 0.68                   |
|                               | Other hospital referral | 1.51                                            | 1.53        | 1.38                    | 1.30                   |
| Tumour                        | Oesophagus              |                                                 | 1           | 1                       | 1                      |
|                               | Stomach                 |                                                 | 1.19        | 1.34                    | 1.63                   |
| Gender                        | Female                  |                                                 | 1           | 1                       | 1                      |
|                               | Male                    |                                                 | 1.16        | 1.19                    | 1.31                   |
| Age (years)                   | Under 55                |                                                 | 1.21        | 1.14                    | 1.37                   |
|                               | 55 to 64                |                                                 | 1.34        | 1.25                    | 1.48                   |
|                               | 65 to 74                |                                                 | 1           | 1                       | 1                      |
|                               | 75 to 84                |                                                 | 0.41        | 0.43                    | 0.34                   |
|                               | 85 & over               |                                                 | 0.07        | 0.08                    | 0.08                   |
| Index of Multiple Deprivation | 1 (Least)               |                                                 | 1           | 1                       | 1                      |
|                               | 2                       |                                                 | 1.10        | 1.09                    | 1.12                   |
|                               | 3                       |                                                 | 0.93        | 0.92                    | 0.90                   |
|                               | 4                       |                                                 | 0.96        | 0.98                    | 1.06                   |
|                               | 5 (Most)                |                                                 | 0.82        | 0.91                    | 0.93                   |
| No. of comorbidities          |                         |                                                 | 0.92        | 0.92                    | 0.82                   |
| Performance Status            | 0                       |                                                 |             | 1                       | 1                      |
|                               | 1                       |                                                 |             | 0.56                    | 0.49                   |
|                               | 2                       |                                                 |             | 0.28                    | 0.18                   |
|                               | 3 or 4                  |                                                 |             | 0.10                    | 0.03                   |
| Pre-treatment Stage           | 1                       |                                                 |             | 2.01                    | 3.22                   |
|                               | 2                       |                                                 |             | 1.62                    | 2.23                   |
|                               | 3                       |                                                 |             | 1                       | 1                      |
|                               | 4                       |                                                 |             | 0.15                    | 0.04                   |
| Area under the curve          |                         |                                                 | 0.72        | 0.86                    | 0.92                   |

Table A4: Results of logistic regression models for association between patient characteristics and odds of patients surviving one year

|                               |                         | Odds ratios of coefficients in regression model |             |                         |                        |
|-------------------------------|-------------------------|-------------------------------------------------|-------------|-------------------------|------------------------|
|                               |                         | Unadjusted                                      | Basic model | Model with imputed data | Complete case analysis |
| Route to Diagnosis            | Urgent GP referral      | 1                                               | 1           | 1                       | 1                      |
|                               | Non-urgent GP referral  | 1.25                                            | 1.23        | 1.11                    | 1.12                   |
|                               | Emergency admission     | 0.48                                            | 0.55        | 0.78                    | 0.85                   |
|                               | Other hospital referral | 1.49                                            | 1.48        | 1.33                    | 1.48                   |
| Tumour                        | Oesophagus              |                                                 | 1           | 1                       | 1                      |
|                               | Stomach                 |                                                 | 1.09        | 1.11                    | 1.11                   |
| Gender                        | Female                  |                                                 | 1           | 1                       | 1                      |
|                               | Male                    |                                                 | 1.03        | 1.01                    | 0.98                   |
| Age (years)                   | Under 55                |                                                 | 1.24        | 1.14                    | 1.12                   |
|                               | 55 to 64                |                                                 | 1.29        | 1.18                    | 1.16                   |
|                               | 65 to 74                |                                                 | 1           | 1                       | 1                      |
|                               | 75 to 84                |                                                 | 0.58        | 0.68                    | 0.66                   |
|                               | 85 & over               |                                                 | 0.34        | 0.47                    | 0.53                   |
| Index of Multiple Deprivation | 1 (Least)               |                                                 | 1           | 1                       | 1                      |
|                               | 2                       |                                                 | 1.10        | 1.10                    | 1.19                   |
|                               | 3                       |                                                 | 1.06        | 1.10                    | 1.11                   |
|                               | 4                       |                                                 | 0.98        | 1.02                    | 1.14                   |
|                               | 5 (Most)                |                                                 | 0.88        | 0.99                    | 1.02                   |
| No. of comorbidities          |                         |                                                 | 1.01        | 1.03                    | 1.02                   |
| Performance Status            | 0                       |                                                 |             | 1                       | 1                      |
|                               | 1                       |                                                 |             | 0.58                    | 0.59                   |
|                               | 2                       |                                                 |             | 0.34                    | 0.33                   |
|                               | 3 or 4                  |                                                 |             | 0.18                    | 0.14                   |
| Pre-treatment Stage           | 1                       |                                                 |             | 2.92                    | 3.37                   |
|                               | 2                       |                                                 |             | 1.70                    | 1.64                   |
|                               | 3                       |                                                 |             | 1                       | 1                      |
|                               | 4                       |                                                 |             | 0.31                    | 0.30                   |
| Area under the curve          |                         |                                                 | 0.65        | 0.79                    | 0.80                   |
